# Supplementary material for: Theoretical investigation of the nature of π(BB)⋯M interactions in coinage metal π-diborene complexes
Source: Royal Society of Chemistry journal article supplement (doi:10.1039/d1nj02744a), 2021-01-01
Supplement: d1nj02744a1.pdf [file d1nj02744a1.pdf]

## Supporting Information for

# Theoretical Investigation on the Nature of $\pi(\text{B}\equiv\text{B})\cdots\text{M}$ Interaction in Coinage Metal $\pi$ -Diborene Complexes

Zhendong Li,<sup>a</sup> Yulin Liu,<sup>a</sup> Xiaomeng Li,<sup>a</sup> Qingzhong Li,<sup>b</sup> and Xiaoyan Li<sup>\*a</sup>

<sup>a</sup>College of Chemistry and Material Science, Hebei Key Laboratory of Inorganic and Nano-Materials, National Demonstration Center for Experimental Chemistry, Hebei Normal University, Road East of 2nd Ring South, Shijiazhuang, 050024, China.

<sup>b</sup> The Laboratory of Theoretical and Computational Chemistry, College of Chemistry & Chemical Engineering, Yantai University, Yantai, 264005, China

Fig. S1 Geometries of  $\text{B}_2\text{IDip}_2\cdots n\text{MCl}$  ( $n=1, 2, 3$ ;  $\text{M}=\text{Ag}$  and  $\text{Au}$ )

Fig. S2 Molecular graphs of  $\text{B}_2\text{IDip}_2\cdots n\text{MCl}$  ( $n=1, 2, 3$ ;  $\text{M}=\text{Ag}$  and  $\text{Au}$ )

Fig. S3 Contour maps of Laplacian for  $\text{B}_2\text{IDip}_2$ ,  $\text{CuCl}$  and  $\text{B}_2\text{IDip}_2\cdots\text{CuCl}$

Fig. S4 Plots of the reduced density gradient versus the electron density multiplied by the sign of the second Hessian eigenvalue and isosurfaces generated for  $s=0.05$  a.u. (below) for  $\text{B}_2\text{IDip}_2\cdots n\text{MCl}$  ( $n=1, 2, 3$ ;  $\text{M}=\text{Ag}$  and  $\text{Au}$ )

Fig. S5 the ELF localization domains of  $\text{B}_2\text{IDip}_2\cdots\text{CuCl}$  at different isosurfaces

Table S1 Geometry parameters of the studied complexes optimized at M06L/def2-SVP level

Table S2 Geometry parameters of the studied complexes optimized at M06L/def2-TZVP level

Table S3 The optimized xyz coordinations for  $\text{B}_2\text{IDip}_2$ ,  $\text{MCl}$  ( $\text{M}=\text{Cu}$ ,  $\text{Ag}$ , and  $\text{Au}$ ), and nine studied complexes

Table S4 EDA results of  $\text{B}_2\text{IDip}_2\cdots n\text{MCl}$  ( $n=1, 2, 3$ ;  $\text{M}=\text{Cu}$ ,  $\text{Ag}$ , and  $\text{Au}$ ) interactions (in kcal/mol)

Table S5 Natural population analysis charges and Wiberg bond indexes of the studied complexes

Table S6 A selection of NBO results for the studied complexes

Table S7 Topological parameters at the BCP of the  $\pi(\text{B}\equiv\text{B})\cdots\text{M}$  interaction and  $\text{B}\equiv\text{B}$  bonds

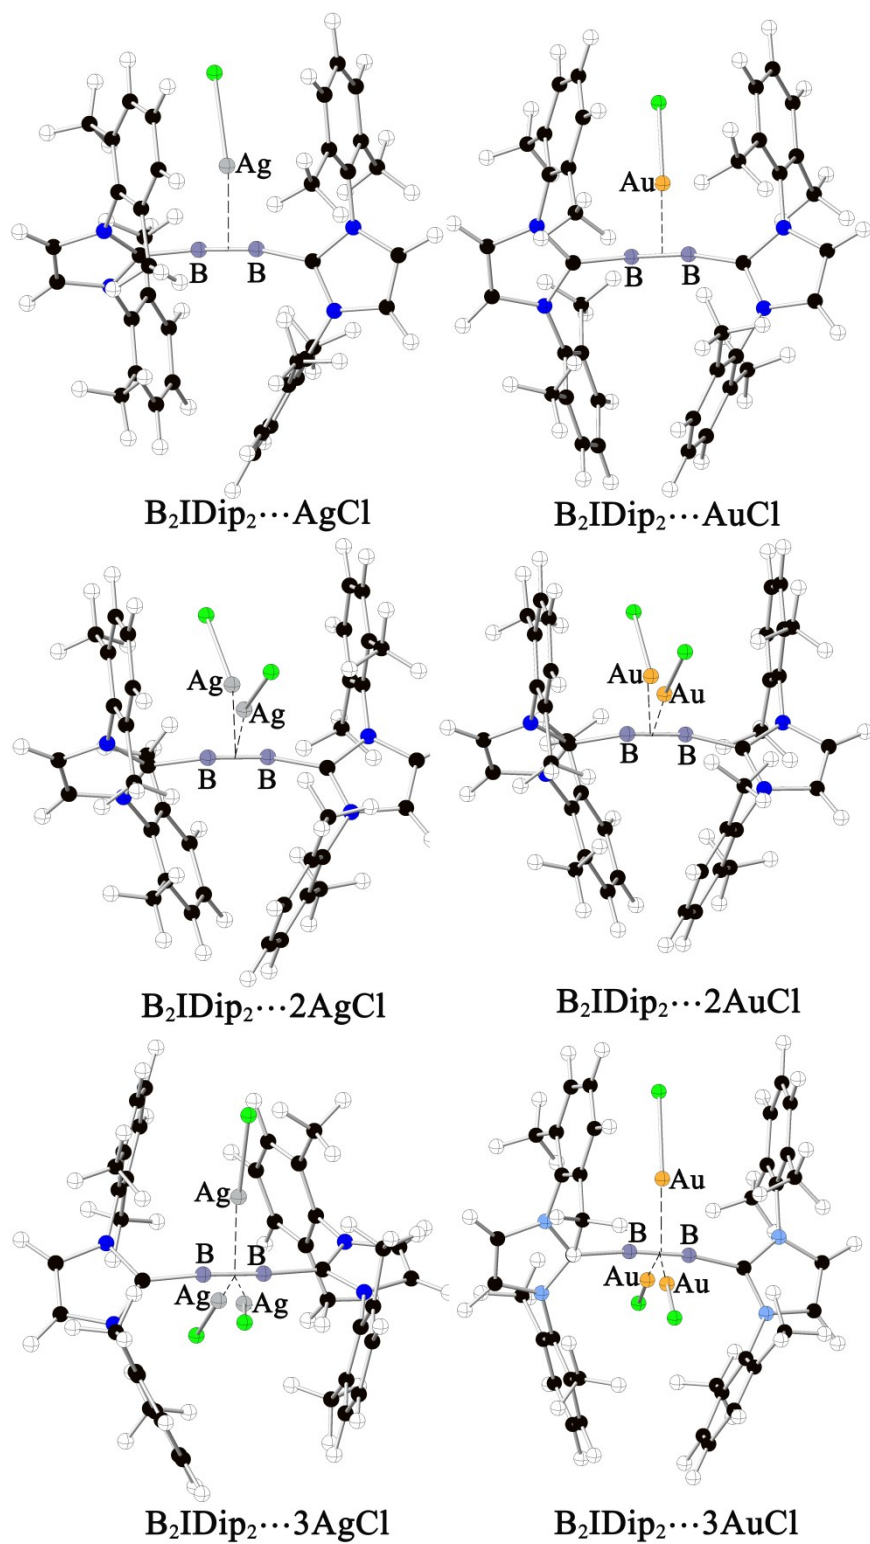

Fig. S1 Geometries of  $B_2IDip_2 \cdots nMCl$  ( $n=1, 2, 3$ ;  $M=Ag$  and  $Au$ )

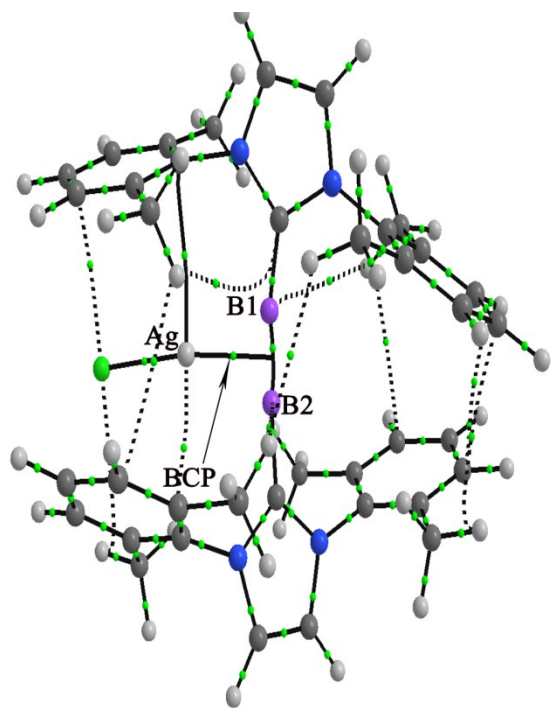

$B_2IDip_2 \cdots AgCl$

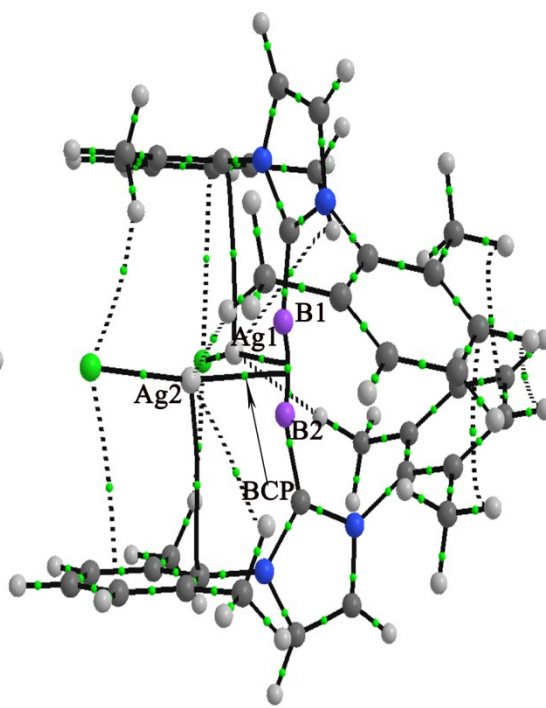

$B_2IDip_2 \cdots 2AgCl$

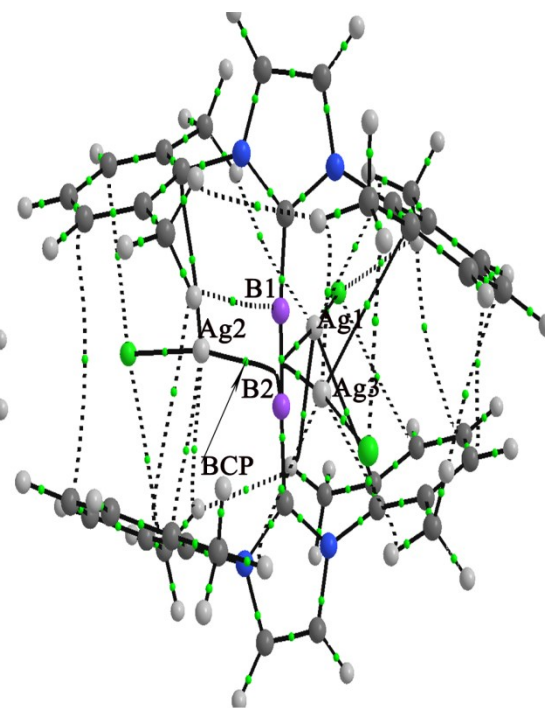

$B_2IDip_2 \cdots 3AgCl$

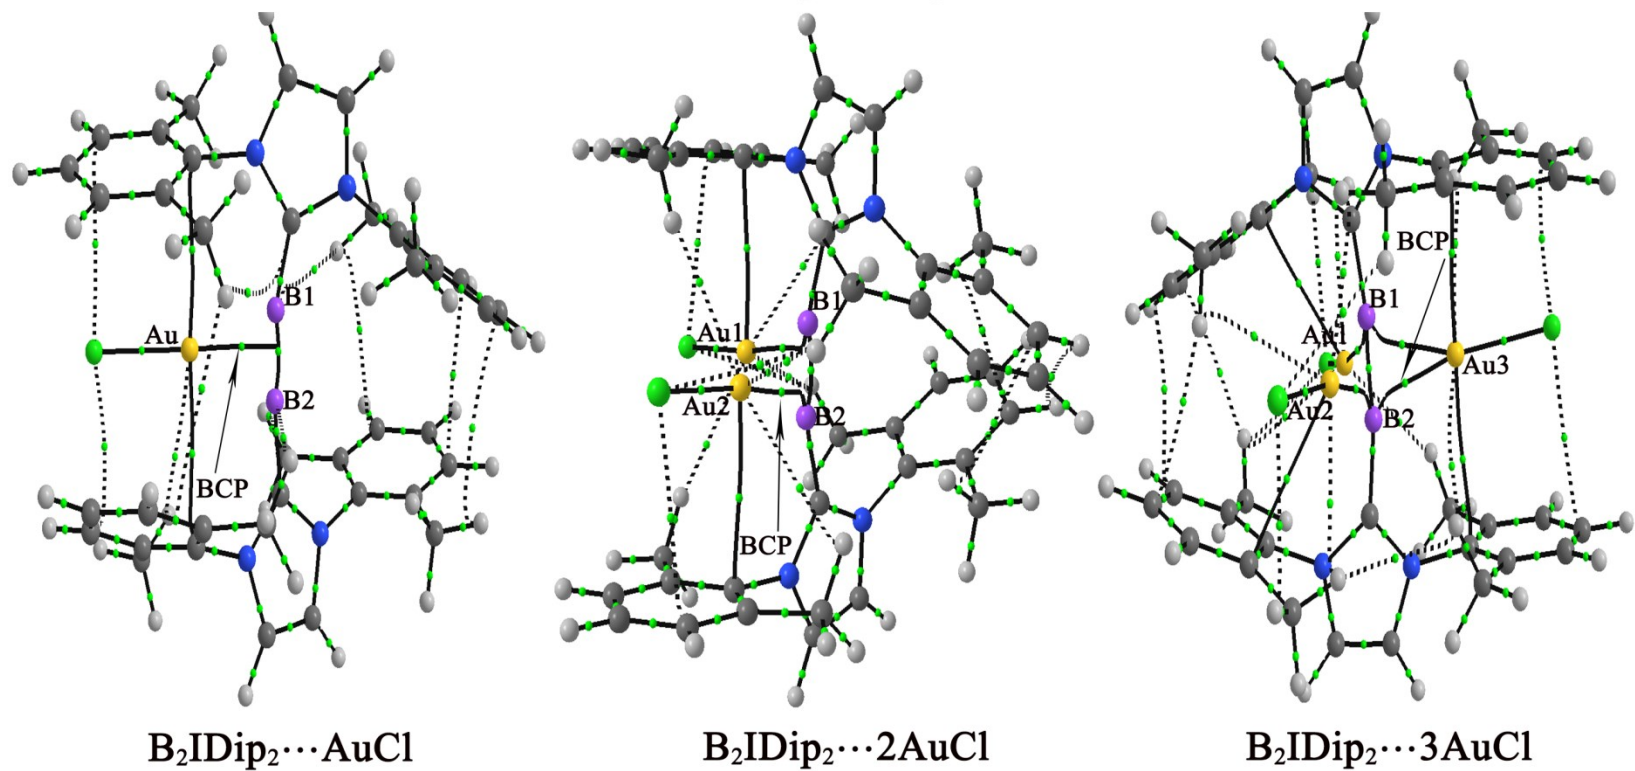

Fig. S2 Molecular graphs of B<sub>2</sub>IDip<sub>2</sub>⋯nMCl (n=1, 2, 3; M=Ag and Au)

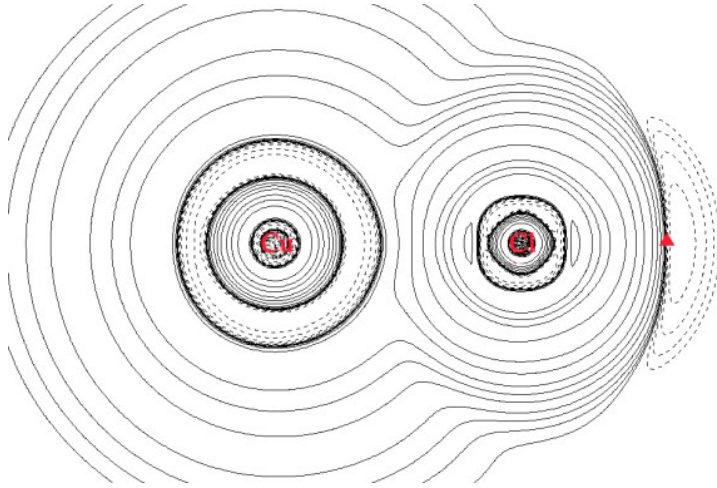

(a)

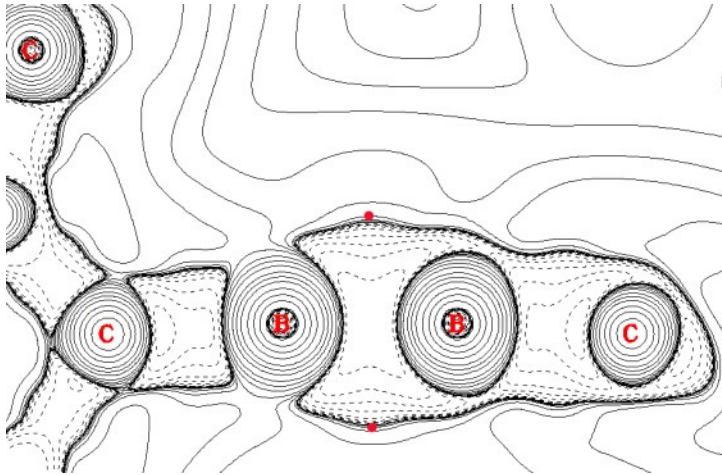

(b)

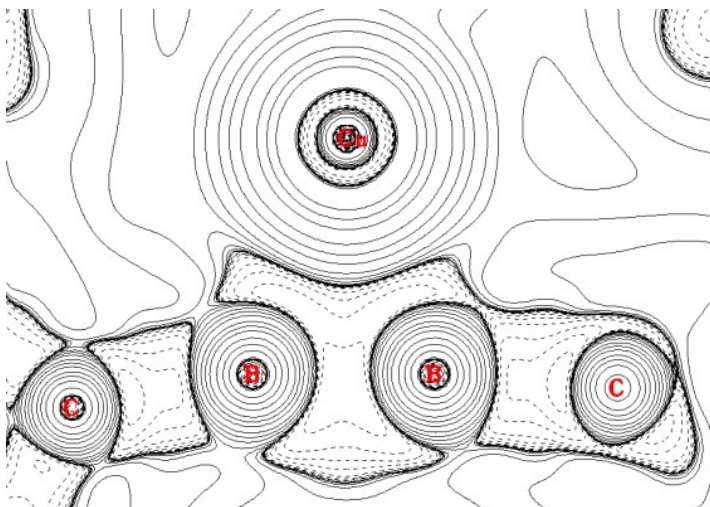

(c)

Fig. S3 Contour maps of Laplacian for CuCl(a), B<sub>2</sub>IDip<sub>2</sub> (b) and B<sub>2</sub>IDip<sub>2</sub> ···CuCl(c)  
(▲:charge depletion region; ●: charge concentration region)



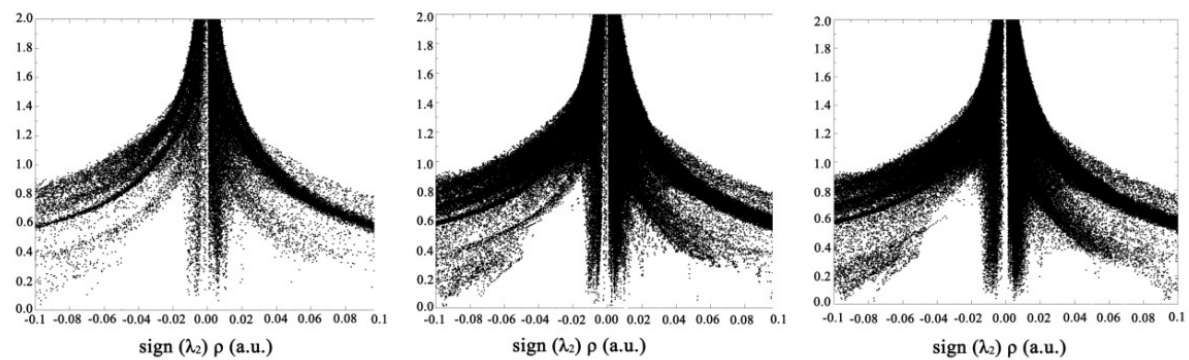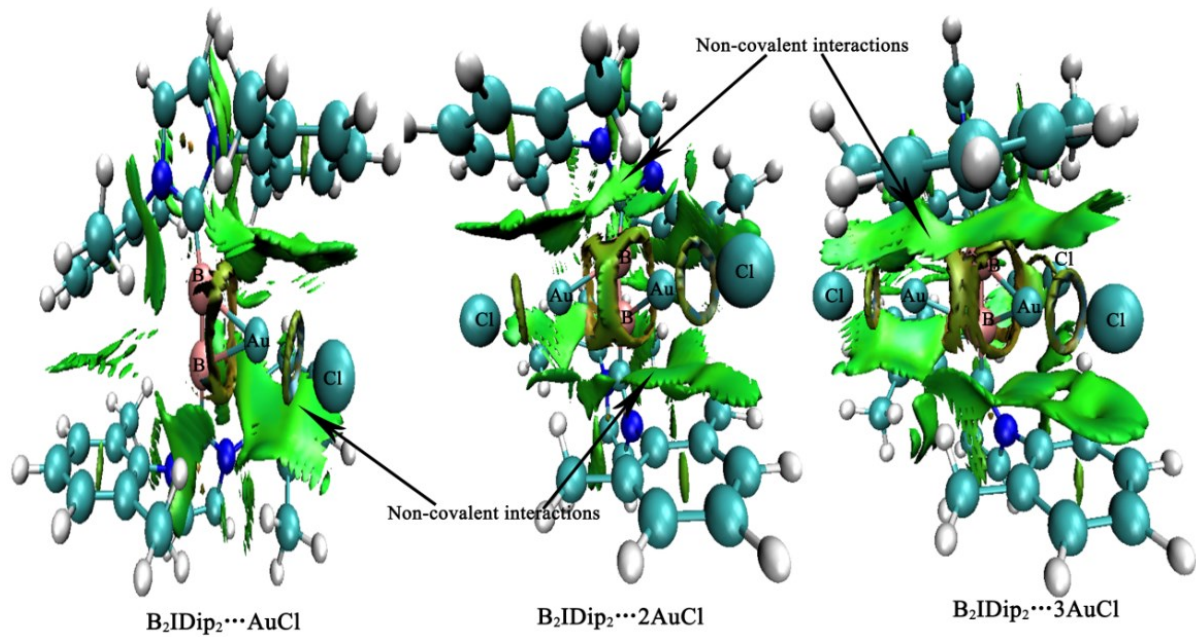

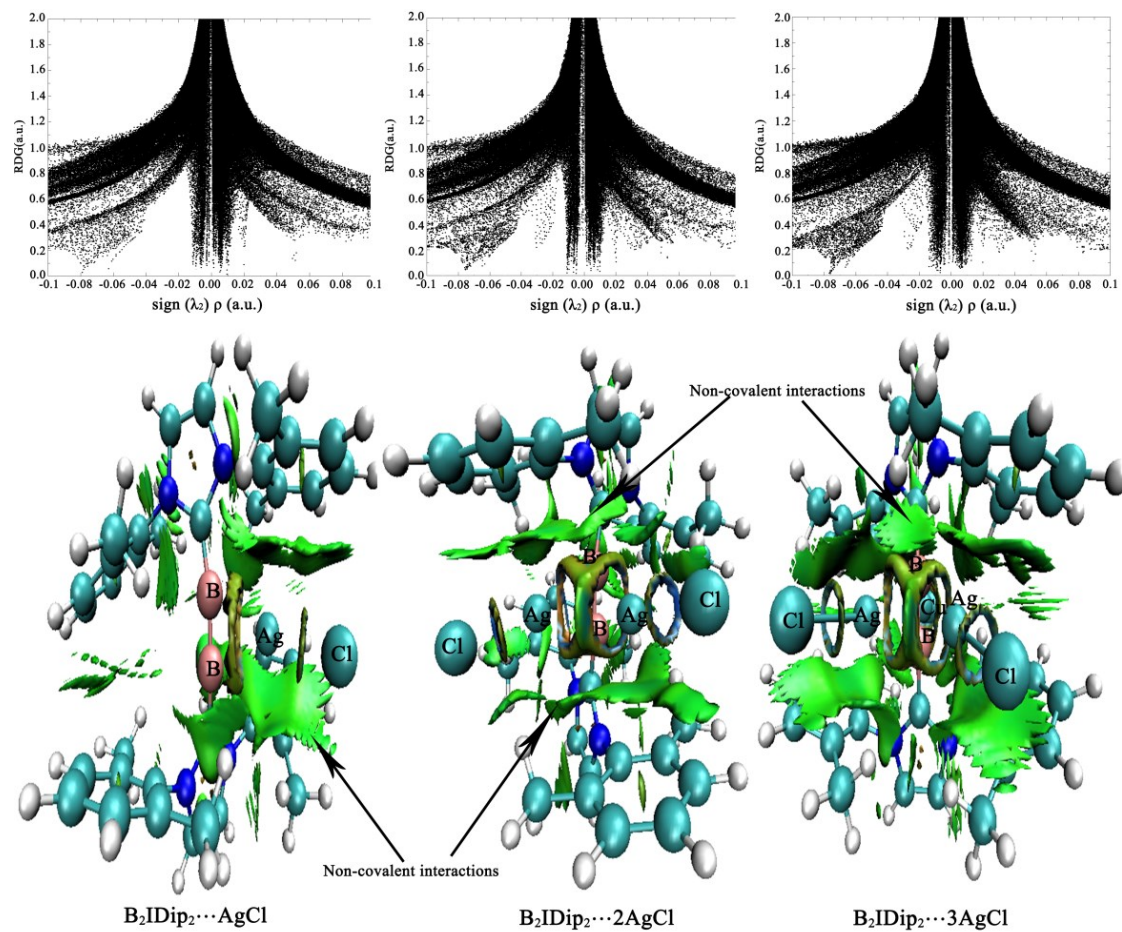

Fig. S4 Plots of the reduced density gradient versus the electron density multiplied by the sign of the second Hessian eigenvalue (above) and isosurfaces generated for  $s=0.05$  a.u. (below) for  $\text{B}_2\text{IDip}_2\cdots n\text{MCl}$  ( $n=1, 2, 3$ ;  $M=\text{Ag}$  and  $\text{Au}$ )



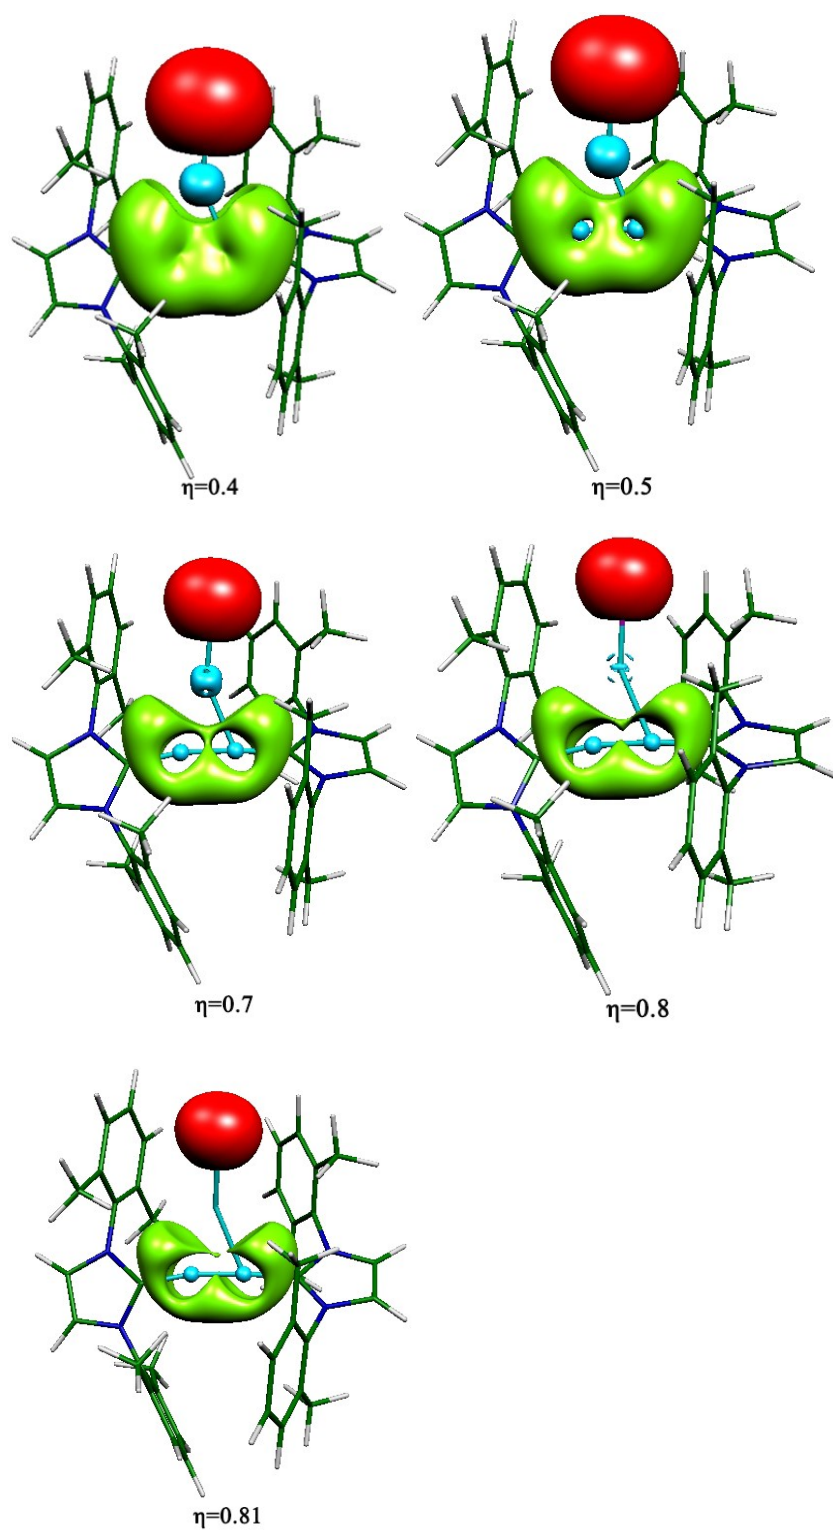

Fig. S5 ELF localization domains of B<sub>2</sub>IDip<sub>2</sub>...CuCl at different isosurfaces

Table S1 Geometry parameters of the studied complexes optimized at M06L/def2-SVP level (in Å)

| □                              | CuCl  | AgCl  | AuCl  | 2CuCl        | 2AgCl | 2AuCl | 3CuCl        | 3AgCl | 3AuCl |
|--------------------------------|-------|-------|-------|--------------|-------|-------|--------------|-------|-------|
| R <sub>B-B</sub>               | 1.480 | 1.483 | 1.494 | 1.504(1.486) | 1.506 | 1.529 | 1.544(1.526) | 1.547 | 1.618 |
| <sup>a</sup> ΔR <sub>B-B</sub> | 0.011 | 0.014 | 0.025 | 0.035        | 0.037 | 0.060 | 0.075        | 0.078 | 0.149 |
| R <sub>B-C</sub>               | 1.493 | 1.495 | 1.500 | 1.516(1.546) | 1.522 | 1.531 | 1.538(1.561) | 1.539 | 1.562 |
| <sup>a</sup> ΔR <sub>B-C</sub> | 0.016 | 0.018 | 0.023 | 0.039        | 0.045 | 0.054 | 0.061        | 0.062 | 0.085 |
| R <sub>M-Cl</sub>              | 2.190 | 2.414 | 2.423 | 2.189(2.161) | 2.403 | 2.405 | 2.173(2.123) | 2.394 | 2.395 |
|                                |       |       |       | 2.190(2.158) | 2.403 | 2.405 | 2.172(2.123) | 2.399 | 2.394 |
|                                |       |       |       |              |       |       | 2.190(2.192) | 2.389 | 2.402 |
| R <sub>B1-M1</sub>             | 2.066 | 2.246 | 2.189 | 2.061(2.087) | 2.281 | 2.188 | 2.094(2.056) | 2.299 | 2.195 |
| FSR <sub>B1-M1</sub>           | 0.926 | 0.940 | 0.916 | 0.924        | 0.954 | 0.915 | 0.939        | 0.962 | 0.918 |
| R <sub>B2-M2</sub>             | 2.066 | 2.258 | 2.188 | 2.061(2.079) | 2.259 | 2.211 | 2.065(2.107) | 2.247 | 2.201 |
| FSR <sub>B2-M1</sub>           | 0.927 | 0.945 | 0.916 | 0.924        | 0.945 | 0.925 | 0.926        | 0.940 | 0.921 |
| R <sub>B1-M3</sub>             |       |       |       | 2.082(2.075) | 2.260 | 2.211 | 2.113(2.086) | 2.283 | 2.209 |
| FSR <sub>B1-M2</sub>           |       |       |       | 0.934        | 0.946 | 0.925 | 0.948        | 0.955 | 0.924 |
| R <sub>B2-M1</sub>             |       |       |       | 2.081(2.078) | 2.280 | 2.188 | 2.117(2.086) | 2.255 | 2.203 |
| FSR <sub>B2-M2</sub>           |       |       |       | 0.933        | 0.954 | 0.916 | 0.949        | 0.944 | 0.922 |
| R <sub>B1-M2</sub>             |       |       |       |              |       |       | 2.105(2.107) | 2.266 | 2.185 |
| FSR <sub>B1-M3</sub>           |       |       |       |              |       |       | 0.944        | 0.948 | 0.914 |
| R <sub>B2-M3</sub>             |       |       |       |              |       |       | 2.064(2.056) | 2.278 | 2.186 |
| FSR <sub>B2-M3</sub>           | □     | □     | □     | □            | □     | □     | 0.925        | 0.953 | 0.915 |

The numbers in parentheses are experimental geometry parameters from Ref. 23

Table S2 Geometry parameters of the studied complexes optimized at M06L/def2-TZVP level (in Å)

|                                        | $\pi$ -CuCl | $\pi$ -AgCl | $\pi$ -AuCl | $\pi$ -2CuCl | $\pi$ -2AgCl | $\pi$ -2AuCl | $\pi$ -3CuCl | $\pi$ -3AgCl | $\pi$ -3AuCl |
|----------------------------------------|-------------|-------------|-------------|--------------|--------------|--------------|--------------|--------------|--------------|
| R <sub>B-B</sub>                       | 1.466       | 1.467       | 1.480       | 1.491        | 1.493        | 1.516        | 1.534        | 1.538        | 1.612        |
| <sup>a</sup> $\Delta$ R <sub>B-B</sub> | -0.003      | -0.002      | 0.011       | 0.022        | 0.024        | 0.047        | 0.065        | 0.069        | 0.143        |
| R <sub>B-C</sub>                       | 1.491       | 1.500       | 1.505       | 1.513        | 1.516        | 1.525        | 1.535        | 1.535        | 1.558        |
| <sup>a</sup> $\Delta$ R <sub>B-C</sub> | 0.011       | 0.020       | 0.025       | 0.033        | 0.036        | 0.045        | 0.055        | 0.055        | 0.078        |
| R <sub>M-Cl</sub>                      | 2.169       | 2.398       | 2.393       | 2.164        | 2.387        | 2.377        | 2.146        | 2.374        | 2.360        |
|                                        |             |             |             | 2.164        | 2.385        | 2.377        | 2.158        | 2.368        | 2.363        |
|                                        |             |             |             |              |              |              | 2.159        | 2.378        | 2.367        |
| R <sub>B1-M1</sub>                     | 2.054       | 2.241       | 2.189       | 2.074        | 2.298        | 2.192        | 2.115        | 2.294        | 2.190        |
| FSR <sub>B1-M1</sub>                   | 0.921       | 0.938       | 0.916       | 0.930        | 0.962        | 0.917        | 0.948        | 0.960        | 0.916        |
| R <sub>B1-M2</sub>                     | 2.054       | 2.259       | 2.183       | 2.074        | 2.263        | 2.211        | 2.049        | 2.250        | 2.199        |
| FSR <sub>B1-M2</sub>                   | 0.921       | 0.945       | 0.913       | 0.930        | 0.947        | 0.925        | 0.919        | 0.942        | 0.920        |
| R <sub>B1-M2</sub>                     |             |             |             | 2.088        | 2.281        | 2.211        | 2.114        | 2.280        | 2.206        |
| FSR <sub>B1-M2</sub>                   |             |             |             | 0.936        | 0.954        | 0.925        | 0.948        | 0.954        | 0.923        |
| R <sub>B2-M1</sub>                     |             |             |             | 2.088        | 2.279        | 2.192        | 2.136        | 2.251        | 2.197        |
| FSR <sub>B2-M1</sub>                   |             |             |             | 0.936        | 0.953        | 0.917        | 0.958        | 0.942        | 0.919        |
| R <sub>B2-M2</sub>                     |             |             |             |              |              |              | 2.114        | 2.265        | 2.183        |
| FSR <sub>B2-M2</sub>                   |             |             |             |              |              |              | 0.948        | 0.948        | 0.913        |
| R <sub>B2-M3</sub>                     |             |             |             |              |              |              | 2.054        | 2.270        | 2.181        |
| FSR <sub>B2-M3</sub>                   |             |             |             |              |              |              | 0.921        | 0.950        | 0.913        |

<sup>a</sup> $\Delta$ R is the difference between the R in B<sub>2</sub>IDip<sub>2</sub> and that in complex

Table S3 The optimized xyz coordinations for B<sub>2</sub>IDip<sub>2</sub>, MCl(M=Cu, Ag, and Au), and nine studied complexes at M06L/def2-SVP level

|                                  |             |             |             |   |             |             |             |
|----------------------------------|-------------|-------------|-------------|---|-------------|-------------|-------------|
| B <sub>2</sub> IDip <sub>2</sub> |             |             |             | H | -3.99541000 | -3.36064400 | -1.66571700 |
| B                                | -0.65959400 | 0.35905000  | -0.23439900 | C | -3.59233300 | -1.36302800 | -0.97637300 |
| B                                | 0.59846600  | -0.38642600 | -0.37320400 | C | -4.25287200 | -1.91772200 | -3.24962600 |
| N                                | -1.99858100 | 2.12202700  | 1.03521800  | H | -4.53128200 | -2.67063100 | -3.99100200 |
| C                                | -1.89094800 | 1.10407100  | 0.09892100  | C | -4.19489200 | -0.57458600 | -3.61259800 |
| N                                | -3.17280700 | 0.97481700  | -0.41225300 | H | -4.41549400 | -0.27367100 | -4.64035100 |
| C                                | -3.29149800 | 2.61925800  | 1.06487000  | C | -3.83279300 | 0.40246200  | -2.68090400 |
| H                                | -3.57873400 | 3.42097600  | 1.73875000  | C | 1.87181800  | -1.13329800 | -0.32256800 |
| C                                | -0.17998900 | 3.68155000  | 1.47703600  | C | 1.13658700  | -2.87834300 | 1.26046300  |
| C                                | -0.91242400 | 2.54503300  | 1.85633500  | C | -0.73031200 | -4.33930000 | 1.61751000  |
| N                                | 3.08952500  | -0.84583300 | -0.91788200 | H | -1.46360000 | -5.05403600 | 1.23322000  |
| C                                | -4.01964100 | 1.91191500  | 0.16490700  | C | 0.20764700  | -3.79053500 | 0.73631200  |
| H                                | -5.07160700 | 1.96640700  | -0.09800700 | C | 3.32715200  | 0.31696300  | -1.70568500 |
| N                                | 2.10765100  | -2.29810100 | 0.39117900  | C | 3.46412400  | 0.16562900  | -3.09637600 |
| C                                | 0.87507200  | 4.08405600  | 2.30239200  | C | 3.69474000  | 1.31277900  | -3.86111400 |
| H                                | 1.45905400  | 4.96654200  | 2.02595100  | C | 3.76682700  | 2.56639500  | -3.25864600 |
| C                                | 1.19773000  | 3.36271900  | 3.44900700  | H | 3.94007600  | 3.45492500  | -3.87062700 |
| H                                | 2.02607600  | 3.68961400  | 4.08256000  | C | 3.61366800  | 2.69200300  | -1.88135000 |
| C                                | 0.47667800  | 2.21998000  | 3.78513400  | H | 3.66823400  | 3.67831100  | -1.41170600 |
| H                                | 0.74214600  | 1.64708700  | 4.67815500  | C | 3.39489900  | 1.57141400  | -1.07183700 |
| C                                | -0.59120900 | 1.78455100  | 2.99325500  | C | 3.42378700  | -2.70443200 | 0.23685700  |
| C                                | -3.54492100 | -0.01205400 | -1.36835000 | C | 4.03114700  | -1.80897300 | -0.58219300 |
| C                                | -3.95105100 | -2.30476200 | -1.94753800 | C | -0.75021400 | -3.97197700 | 2.96049700  |

|   |             |             |             |      |             |             |             |
|---|-------------|-------------|-------------|------|-------------|-------------|-------------|
| H | -1.49139700 | -4.41026200 | 3.63336100  | C    | 0.19184300  | -4.09920600 | -0.72461000 |
| C | 0.16108600  | -3.03793000 | 3.44746300  | H    | -0.10883600 | -3.20296800 | -1.29449700 |
| H | 0.12659700  | -2.73143500 | 4.49676300  | H    | 1.18417400  | -4.38790500 | -1.10166900 |
| C | 1.11772200  | -2.46648300 | 2.60278800  | H    | -0.51309300 | -4.90626300 | -0.96044600 |
| C | -1.34137600 | 0.53192000  | 3.30587300  | C    | 2.05229500  | -1.39887700 | 3.07124400  |
| H | -2.43097600 | 0.68640700  | 3.29972900  | H    | 3.10740600  | -1.65094500 | 2.88382600  |
| H | -1.13023500 | -0.23625100 | 2.53955100  | H    | 1.85650400  | -0.45887400 | 2.52663700  |
| H | -1.05887900 | 0.12447300  | 4.28517900  | H    | 1.93766100  | -1.20271000 | 4.14495400  |
| C | -3.25582800 | -1.78491200 | 0.41476700  | C    | -0.48942400 | 4.38389300  | 0.19440100  |
| H | -2.16134500 | -1.77163600 | 0.56797400  | H    | -0.33844800 | 3.70412800  | -0.66022200 |
| H | -3.67441000 | -1.10240200 | 1.16936400  | H    | -1.53518000 | 4.72261600  | 0.13981100  |
| H | -3.61970300 | -2.79910400 | 0.62522300  | H    | 0.15567200  | 5.25918600  | 0.04903000  |
| C | -3.71538400 | 1.84332400  | -3.06402600 | H    | 5.05231400  | -1.75857700 | -0.94778800 |
| H | -2.75365200 | 2.26602900  | -2.73604900 | H    | 3.80683600  | -3.59551700 | 0.72552100  |
| H | -3.79339000 | 1.97458400  | -4.15021900 | H    | 3.79767600  | 1.21734600  | -4.94538500 |
| H | -4.49735800 | 2.46618600  | -2.60189800 | CuCl |             |             |             |
| C | 3.32346300  | -1.18286200 | -3.72783300 | Cl   | 0.00000000  | 0.00000000  | -1.31303200 |
| H | 4.14348000  | -1.86420300 | -3.45223600 | Cu   | 0.00000000  | 0.00000000  | 0.76970800  |
| H | 2.39353300  | -1.67589500 | -3.40575200 | AgCl |             |             |             |
| H | 3.30991100  | -1.11226300 | -4.82228800 | Cl   | 0.00000000  | 0.00000000  | -1.70470500 |
| C | 3.22312300  | 1.70824600  | 0.40421300  | Ag   | 0.00000000  | 0.00000000  | 0.61659500  |
| H | 3.75110100  | 0.91600000  | 0.95600500  | AuCl |             |             |             |
| H | 3.58730800  | 2.67994600  | 0.76227000  | Cl   | 0.00000000  | 0.00000000  | -1.87914400 |
| H | 2.15659800  | 1.61865100  | 0.68049900  | Au   | 0.00000000  | 0.00000000  | 0.40437300  |



B<sub>2</sub>IDip<sub>2</sub>...CuCl

|    |             |             |             |   |             |             |             |
|----|-------------|-------------|-------------|---|-------------|-------------|-------------|
| B  | 0.33516100  | -0.66954900 | 0.12551000  | C | 4.80499500  | -1.28194800 | -2.36811100 |
| B  | 0.05999400  | 0.77603300  | -0.03308900 | H | 5.59919800  | -0.89944100 | -3.01445400 |
| N  | -0.12098100 | -2.99832000 | 1.13633700  | C | 3.61857900  | -1.74513000 | -2.93122600 |
| C  | 0.65487400  | -2.10286500 | 0.44260300  | H | 3.47896500  | -1.71874200 | -4.01500200 |
| N  | 1.77961000  | -2.80293000 | 0.09820300  | C | 2.59083500  | -2.25224800 | -2.12870900 |
| C  | 0.51148700  | -4.22357100 | 1.21121800  | C | 0.01171500  | 2.26836500  | -0.04291500 |
| H  | 0.06021300  | -5.06773700 | 1.72347800  | C | 2.36026700  | 2.74772100  | 0.60475800  |
| Cl | -3.05816900 | -1.08921800 | -2.13678900 | C | 4.53894200  | 1.96067200  | -0.00066500 |
| C  | -2.50387700 | -3.13792200 | 0.70593500  | H | 5.24539900  | 1.62189200  | -0.76271600 |
| C  | -1.46295800 | -2.69663800 | 1.53799200  | C | 3.23747400  | 2.29438400  | -0.39326900 |
| N  | -1.07471900 | 3.07548800  | -0.29127500 | C | -2.39944500 | 2.57991600  | -0.52024400 |
| C  | 1.70053200  | -4.10409500 | 0.56148700  | C | -2.87622500 | 2.49135100  | -1.83581400 |
| H  | 2.49603100  | -4.82228100 | 0.38773500  | C | -4.18473000 | 2.03683300  | -2.01737400 |
| N  | 1.03701800  | 3.14473000  | 0.24178700  | C | -4.96547500 | 1.65815900  | -0.93223600 |
| C  | -3.80318000 | -2.74266000 | 1.03658500  | C | -4.45561000 | 1.72444100  | 0.36079700  |
| H  | -4.62441600 | -3.03164700 | 0.37710100  | H | -5.06699000 | 1.40788900  | 1.21012500  |
| C  | -4.04331100 | -1.95588100 | 2.15839100  | C | -3.16123800 | 2.19357800  | 0.59666600  |
| H  | -5.06522600 | -1.65139600 | 2.39772600  | C | 0.58544200  | 4.45130600  | 0.18326000  |
| C  | -2.98967800 | -1.54074300 | 2.96957400  | C | -0.73100500 | 4.40671900  | -0.15316500 |
| H  | -3.18377000 | -0.91448300 | 3.84502000  | C | 4.93541000  | 2.05273700  | 1.33001500  |
| C  | -1.67010200 | -1.89194600 | 2.66861400  | H | 5.95777000  | 1.78790000  | 1.61296400  |
| C  | 2.80972400  | -2.27140600 | -0.74115800 | C | 4.03230200  | 2.47049600  | 2.30467300  |
| C  | 4.98139800  | -1.29519000 | -0.98727700 | H | 4.33694800  | 2.51912400  | 3.35355100  |
| H  | 5.90517500  | -0.91125700 | -0.54550900 | C | 2.72398300  | 2.82346900  | 1.95978900  |
| C  | 3.97771100  | -1.77861800 | -0.14182100 | C | -0.52079300 | -1.38364600 | 3.47580500  |

|   |             |             |             |    |             |             |             |
|---|-------------|-------------|-------------|----|-------------|-------------|-------------|
| H | 0.22190100  | -2.16716200 | 3.68785300  | H  | -1.77563600 | 1.50222500  | 2.07683200  |
| H | 0.01192000  | -0.58898300 | 2.92316200  | C  | 2.78159100  | 2.12815300  | -1.80370800 |
| H | -0.85703200 | -0.96337200 | 4.43224200  | H  | 2.11369200  | 1.25093400  | -1.87351800 |
| C | 4.10347800  | -1.71649700 | 1.34606100  | H  | 2.19853000  | 2.99089200  | -2.15948900 |
| H | 3.35630100  | -1.02332600 | 1.76698200  | H  | 3.62618100  | 1.97099600  | -2.48602500 |
| H | 3.93417300  | -2.69160000 | 1.82687600  | C  | 1.72167200  | 3.22848200  | 2.99326100  |
| H | 5.09425300  | -1.35693300 | 1.65008500  | H  | 1.39133300  | 4.27223200  | 2.87543900  |
| C | 1.29881200  | -2.72473100 | -2.71212400 | H  | 0.81332000  | 2.60933700  | 2.92689300  |
| H | 0.46829400  | -2.04424800 | -2.45026200 | H  | 2.12864900  | 3.12568800  | 4.00654100  |
| H | 1.34821200  | -2.77701100 | -3.80610100 | C  | -2.21340500 | -3.94211000 | -0.51862900 |
| H | 1.01221700  | -3.71976500 | -2.33892500 | H  | -3.11856100 | -4.09166900 | -1.11658900 |
| C | -1.97776800 | 2.76708900  | -2.99712100 | H  | -1.49650900 | -3.41432800 | -1.16676500 |
| H | -1.39347500 | 3.69175500  | -2.88207800 | H  | -1.78513200 | -4.92835900 | -0.27804900 |
| H | -1.25280800 | 1.94312000  | -3.11075400 | H  | -5.97561000 | 1.27802800  | -1.09899300 |
| H | -2.54249000 | 2.83206400  | -3.93490700 | H  | -4.57175100 | 1.93090000  | -3.03314000 |
| C | -2.58237200 | 2.24909500  | 1.97260800  | H  | -1.45380500 | 5.20051300  | -0.31542100 |
| H | -2.13528800 | 3.22953500  | 2.20019300  | H  | 1.24753200  | 5.29198100  | 0.36771200  |
| H | -3.34174200 | 2.03653000  | 2.73560200  | Cu | -1.46136800 | -0.38375900 | -0.81360800 |

B<sub>2</sub>IDip<sub>2</sub>...2CuCl

|    |             |             |             |    |             |             |             |
|----|-------------|-------------|-------------|----|-------------|-------------|-------------|
| B  | 0.20441500  | 0.74840500  | 0.07548100  | C  | 0.30783900  | 4.44037300  | 0.60094300  |
| B  | 0.20178600  | -0.74854400 | -0.07100400 | H  | -0.12532900 | 5.42105400  | 0.43078800  |
| N  | -0.25284500 | 3.30108100  | 0.06067500  | Cl | -2.44698400 | 0.14826900  | 3.09060700  |
| C  | 0.47043400  | 2.20146200  | 0.41714700  | C  | -2.67917200 | 3.38907900  | -0.06770400 |
| Cl | -2.44253200 | -0.13646100 | -3.08939500 | C  | -1.44729300 | 3.27584900  | -0.73605000 |
| N  | 1.49632000  | 2.67977200  | 1.18142000  | N  | -0.28035900 | -3.29600300 | -0.07834900 |

|   |             |             |             |   |             |             |             |
|---|-------------|-------------|-------------|---|-------------|-------------|-------------|
| C | 1.40545200  | 4.05246300  | 1.30436400  | C | -2.52365400 | -3.16915200 | 2.87036900  |
| H | 2.12965500  | 4.62222600  | 1.87853800  | C | -3.76118200 | -3.29277600 | 2.25232800  |
| N | 1.47497000  | -2.68372600 | -1.19314100 | C | -3.85211300 | -3.38947900 | 0.86594500  |
| C | -3.83273500 | 3.39906600  | -0.85693500 | H | -4.82944800 | -3.46239300 | 0.38239000  |
| H | -4.80651400 | 3.47105300  | -0.36613900 | C | -2.70454900 | -3.37999100 | 0.06897800  |
| C | -3.75193300 | 3.30502600  | -2.24371100 | C | 1.36891100  | -4.05413700 | -1.32913300 |
| H | -4.66531700 | 3.30107300  | -2.84219700 | C | 0.26698700  | -4.43633900 | -0.62950000 |
| C | -2.51841100 | 3.18580800  | -2.87159200 | C | 4.53709800  | -0.39230500 | -2.88917600 |
| H | -2.46455100 | 3.06906600  | -3.95562200 | H | 5.34535600  | 0.18987200  | -3.33908000 |
| C | -1.33313300 | 3.16390900  | -2.13102700 | C | 3.35498200  | -0.59182400 | -3.59597500 |
| C | 2.51657900  | 1.86436300  | 1.76912800  | H | 3.23343200  | -0.16446300 | -4.59474800 |
| C | 4.69068800  | 0.87605600  | 1.63420100  | C | 2.30911900  | -1.34732900 | -3.05132700 |
| H | 5.61975900  | 0.69101600  | 1.08752400  | C | -0.01597500 | 2.94245300  | -2.80166400 |
| C | 3.68500800  | 1.63508000  | 1.02784400  | H | 0.81089800  | 3.47877100  | -2.31434600 |
| C | 4.51353500  | 0.35225000  | 2.91276300  | H | 0.23940100  | 1.86675800  | -2.78166000 |
| H | 5.30860600  | -0.24148600 | 3.37096100  | H | -0.04990200 | 3.24344600  | -3.85607100 |
| C | 3.32865700  | 0.57249900  | 3.60877700  | C | 3.81094100  | 2.15476100  | -0.36748600 |
| H | 3.19208300  | 0.15054600  | 4.60792600  | H | 3.09023500  | 1.64997200  | -1.03417600 |
| C | 2.29938200  | 1.34254200  | 3.05319000  | H | 3.60342500  | 3.23369800  | -0.43411200 |
| C | 0.45454200  | -2.20104200 | -0.42456700 | H | 4.81495900  | 1.98086600  | -0.77340100 |
| C | 2.50870900  | -1.87696500 | -1.76776700 | C | 1.01541800  | 1.58615200  | 3.77367400  |
| C | 4.69493300  | -0.92048200 | -1.60961100 | H | 0.16031700  | 1.10096600  | 3.26930900  |
| H | 5.62162200  | -0.74986400 | -1.05427800 | H | 1.04699400  | 1.19565000  | 4.79764700  |
| C | 3.67250200  | -1.66555100 | -1.01411500 | H | 0.76541400  | 2.65652900  | 3.82912600  |
| C | -1.46706400 | -3.26578300 | 0.72816900  | C | -0.02599800 | -2.91592600 | 2.79063000  |
| C | -1.34275500 | -3.14716600 | 2.12147300  | H | 0.82673000  | -3.31676500 | 2.22486400  |

|   |             |             |             |    |             |             |             |            |
|---|-------------|-------------|-------------|----|-------------|-------------|-------------|------------|
| H | 0.14313100  | -1.82982800 | 2.90735500  | H  | 0.17630200  | -1.06749800 | -3.27924900 |            |
| H | -0.00821800 | -3.35085600 | 3.79840000  | H  | 1.07060400  | -1.17287600 | -4.80313300 |            |
| C | -2.77312600 | -3.45094300 | -1.42159800 | C  | -2.73752500 | 3.45961500  | 1.42317900  |            |
| H | -2.28885800 | -4.35546600 | -1.82230900 | H  | -3.77414100 | 3.47226200  | 1.77933100  |            |
| H | -3.81210900 | -3.44930800 | -1.77103300 | H  | -2.25437300 | 2.58412000  | 1.88925200  |            |
| H | -2.28015800 | -2.58310600 | -1.89159600 | H  | -2.23749800 | 4.35666400  | 1.82123900  |            |
| C | 3.77393000  | -2.19165100 | 0.38109800  | H  | -0.17644600 | -5.41374000 | -0.46746500 |            |
| H | 3.03882900  | -1.69298100 | 1.03747100  | H  | 2.08685200  | -4.62638100 | -1.90865200 |            |
| H | 3.56716100  | -3.27152400 | 0.43732900  | H  | -2.46241400 | -3.04843300 | 3.95363600  |            |
| H | 4.77008500  | -2.01896900 | 0.80632600  | H  | -4.67015600 | -3.28871200 | 2.85749000  |            |
| C | 1.02572600  | -1.56594500 | -3.78065400 | Cu | -1.23922500 | 0.09922200  | -1.27641000 |            |
| H | 0.75639800  | -2.63129100 | -3.84104600 | Cu |             | -1.24205700 | -0.09479900 | 1.27774000 |

B<sub>2</sub>IDip<sub>2</sub>...3CuCl

|    |             |             |             |   |             |             |             |  |
|----|-------------|-------------|-------------|---|-------------|-------------|-------------|--|
| B  | -0.15881800 | 0.83326400  | 0.04047200  | C | -1.65421200 | 4.26238100  | -0.12450000 |  |
| B  | -0.05295100 | -0.70629000 | 0.10399800  | H | -2.50241200 | 4.89644500  | -0.36295000 |  |
| N  | 0.25766100  | 3.35889600  | 0.47841100  | N | -1.05882500 | -2.87672700 | 1.13133200  |  |
| C  | -0.52986000 | 2.32205100  | 0.07803600  | C | 3.93787100  | 3.11787400  | 0.35043300  |  |
| Cl | 1.92635200  | -0.25196900 | 3.58469000  | H | 4.73872800  | 3.14300500  | -0.39115400 |  |
| N  | -1.71126900 | 2.89356500  | -0.28840500 | C | 4.22212200  | 2.85175300  | 1.68721600  |  |
| C  | -0.41584900 | 4.55305200  | 0.35754300  | H | 5.25626800  | 2.68118600  | 1.99467300  |  |
| H  | 0.04914900  | 5.49612400  | 0.62764300  | C | 3.20395700  | 2.78044700  | 2.63385000  |  |
| Cl | 3.46368500  | 0.50805300  | -1.96005800 | H | 3.43085300  | 2.54011400  | 3.67430200  |  |
| C  | 2.62125600  | 3.31327400  | -0.07451500 | C | 1.86944000  | 2.96752600  | 2.26092300  |  |
| C  | 1.62040100  | 3.21540300  | 0.90313200  | C | -2.85374000 | 2.20114500  | -0.81004500 |  |
| N  | 0.78115100  | -3.16250000 | 0.02523500  | C | -4.89319400 | 1.01810900  | -0.44500900 |  |

|   |             |             |             |   |             |             |             |
|---|-------------|-------------|-------------|---|-------------|-------------|-------------|
| H | -5.62770300 | 0.57937600  | 0.23417300  | C | -2.33572500 | -2.09864300 | 3.05440000  |
| C | -3.74902300 | 1.61141500  | 0.09567700  | C | 0.74749300  | 2.90617700  | 3.24974400  |
| C | -5.10279700 | 0.98939800  | -1.82214200 | H | 0.22767500  | 3.87412900  | 3.33819400  |
| H | -5.99818500 | 0.50906600  | -2.22423600 | H | -0.01216700 | 2.15916700  | 2.96201000  |
| C | -4.17873800 | 1.55919100  | -2.69176200 | H | 1.10963000  | 2.61193500  | 4.24097800  |
| H | -4.32434300 | 1.49880600  | -3.77209600 | C | -3.46290400 | 1.59276300  | 1.56166200  |
| C | -3.03594500 | 2.19624200  | -2.20047700 | H | -2.67827300 | 0.85042200  | 1.79573800  |
| C | -0.11684700 | -2.21310900 | 0.40650900  | H | -3.09762800 | 2.56169300  | 1.93404400  |
| C | -2.27411200 | -2.33306900 | 1.67106000  | H | -4.35265900 | 1.31997500  | 2.14199600  |
| C | -4.58296500 | -1.78845200 | 1.38696500  | C | -2.01955200 | 2.81509900  | -3.10450900 |
| H | -5.46401600 | -1.69815500 | 0.74735400  | H | -1.01756700 | 2.39387200  | -2.91956900 |
| C | -3.37060200 | -2.17908100 | 0.80620800  | H | -2.24969200 | 2.61682700  | -4.15699000 |
| C | 1.91555600  | -2.96197600 | -0.83901300 | H | -1.94551300 | 3.90536500  | -2.96407300 |
| C | 1.70240200  | -3.05668200 | -2.22428100 | C | 0.34095800  | -3.32494800 | -2.77537700 |
| C | 2.82479300  | -2.93549800 | -3.04722700 | H | 0.00530600  | -4.34907100 | -2.54193600 |
| C | 4.09233600  | -2.75802900 | -2.50212200 | H | -0.41878200 | -2.63668400 | -2.37440500 |
| H | 4.95449200  | -2.65153800 | -3.16366700 | H | 0.31427500  | -3.20063100 | -3.86351100 |
| C | 4.27014500  | -2.69981400 | -1.12444500 | C | 3.34156800  | -2.72280400 | 1.22578300  |
| H | 5.26710000  | -2.54700900 | -0.70546800 | H | 2.78948500  | -1.87290100 | 1.66036000  |
| C | 3.18152200  | -2.79691300 | -0.25517900 | H | 2.96076900  | -3.62236500 | 1.73457800  |
| C | -0.74347000 | -4.21766700 | 1.21056500  | H | 4.39321300  | -2.60032400 | 1.50910000  |
| C | 0.41060000  | -4.39506500 | 0.51418900  | C | -3.25371200 | -2.41794200 | -0.66255400 |
| C | -4.67992200 | -1.54370300 | 2.75312400  | H | -2.74392800 | -1.58106900 | -1.17575800 |
| H | -5.63868800 | -1.24356100 | 3.18399400  | H | -2.67411900 | -3.32247400 | -0.90060900 |
| C | -3.56588300 | -1.68346300 | 3.57643300  | H | -4.23925700 | -2.51613400 | -1.13367900 |
| H | -3.64490900 | -1.48765000 | 4.64870900  | C | -1.13737400 | -2.29611500 | 3.92213100  |



|   |             |             |             |    |             |             |             |
|---|-------------|-------------|-------------|----|-------------|-------------|-------------|
| H | -0.80707500 | -3.34644800 | 3.93225900  | Cl | -1.60625700 | -0.49238500 | -3.69340900 |
| H | -0.27058200 | -1.70348100 | 3.58619100  | H  | 2.69170900  | -2.97670600 | -4.13067700 |
| H | -1.34525200 | -2.00991500 | 4.95963300  | H  | 1.00278500  | -5.28281600 | 0.31480700  |
| C | 2.27514400  | 3.59950100  | -1.49962700 | H  | -1.37612000 | -4.91670500 | 1.74873200  |
| H | 3.15688400  | 3.51937100  | -2.14396100 | Cu | -0.70791800 | -0.09196400 | -1.75569200 |
| H | 1.54236200  | 2.87665300  | -1.89224500 | Cu | 1.63726500  | 0.15129900  | -0.83981300 |
| H | 1.84071000  | 4.60547200  | -1.62087800 | Cu | 1.06459200  | 0.15160600  | 1.61179700  |

B<sub>2</sub>IDip<sub>2</sub>...AgCl compound

|    |             |             |             |   |             |             |             |
|----|-------------|-------------|-------------|---|-------------|-------------|-------------|
| B  | 0.46252900  | -0.62451000 | -0.02723200 | H | -4.57398200 | -2.00416200 | 2.87586900  |
| B  | 0.08485600  | 0.80834500  | -0.08283000 | C | -2.45622900 | -1.74445700 | 3.18287600  |
| N  | 0.25563800  | -2.98793500 | 0.99390200  | H | -2.58268000 | -1.13314400 | 4.08098800  |
| C  | 0.90649300  | -2.03722600 | 0.24557400  | C | -1.16379700 | -2.00253200 | 2.71749700  |
| N  | 2.06339300  | -2.64649200 | -0.16416800 | C | 3.04715300  | -2.01623600 | -0.98916100 |
| C  | 0.99091900  | -4.15394400 | 1.03655900  | C | 5.18401500  | -0.95399500 | -1.19831200 |
| H  | 0.64207800  | -5.02776400 | 1.57826600  | H | 6.10859000  | -0.58346900 | -0.74676100 |
| Cl | -3.63591200 | -1.38261100 | -1.79327700 | C | 4.22074200  | -1.54893500 | -0.37810700 |
| C  | -2.14838100 | -3.30351400 | 0.86163900  | C | 4.96464700  | -0.81179200 | -2.56587700 |
| C  | -1.04597200 | -2.78573500 | 1.55871500  | H | 5.72584500  | -0.34091100 | -3.19310800 |
| N  | -1.12263900 | 3.10389100  | -0.08056000 | C | 3.77789700  | -1.26080200 | -3.13882100 |
| C  | 2.12409200  | -3.94339900 | 0.31434500  | H | 3.60739800  | -1.14028500 | -4.21180200 |
| H  | 2.96257000  | -4.59538400 | 0.08966700  | C | 2.78991800  | -1.87751900 | -2.36272400 |
| N  | 0.98501600  | 3.14778700  | 0.46607000  | C | -0.02185600 | 2.29179100  | 0.07144300  |
| C  | -3.42094000 | -3.00957100 | 1.36182700  | C | 2.31333800  | 2.73449800  | 0.78907600  |
| H  | -4.29587500 | -3.35422700 | 0.80718300  | C | 4.53224500  | 2.14498500  | 0.11001900  |
| C  | -3.57144900 | -2.23697000 | 2.50843100  | H | 5.26804000  | 1.97862100  | -0.68072600 |

|   |             |             |             |    |             |             |             |
|---|-------------|-------------|-------------|----|-------------|-------------|-------------|
| C | 3.22870400  | 2.50511700  | -0.24956600 | H  | 1.22141600  | -3.34882400 | -2.61073100 |
| C | -2.43617200 | 2.63140300  | -0.40009600 | C  | -1.90822600 | 3.08629800  | -2.81667100 |
| C | -2.85141600 | 2.65286300  | -1.74078500 | H  | -1.52550200 | 4.10629600  | -2.65798200 |
| C | -4.13956700 | 2.19384300  | -2.02396700 | H  | -1.02734900 | 2.42398600  | -2.85214200 |
| C | -4.96567100 | 1.72082100  | -1.00982500 | H  | -2.38575900 | 3.05524100  | -3.80323900 |
| C | -4.52186600 | 1.69368700  | 0.30819500  | C  | -2.71096800 | 2.04437400  | 2.03601300  |
| H | -5.16198600 | 1.28561300  | 1.09471800  | H  | -2.21685200 | 2.96987600  | 2.37014900  |
| C | -3.24288500 | 2.14620600  | 0.64322200  | H  | -3.50596000 | 1.80217900  | 2.75266500  |
| C | 0.50965900  | 4.44278800  | 0.56652300  | H  | -1.95402900 | 1.24081200  | 2.09202100  |
| C | -0.80387400 | 4.41483700  | 0.21893800  | C  | 2.81301900  | 2.60401000  | -1.67968100 |
| C | 4.89409200  | 1.99985200  | 1.44573900  | H  | 2.22240600  | 1.71581300  | -1.96222900 |
| H | 5.91898700  | 1.72021300  | 1.70434300  | H  | 2.17105300  | 3.47694000  | -1.86887400 |
| C | 3.95582000  | 2.20359500  | 2.45513300  | H  | 3.68017400  | 2.65843600  | -2.34977400 |
| H | 4.23772200  | 2.07335300  | 3.50352200  | C  | 1.61166000  | 2.78328400  | 3.20670700  |
| C | 2.64417400  | 2.57505300  | 2.14486000  | H  | 1.30060000  | 3.83704200  | 3.28345800  |
| C | 0.04302000  | -1.42936300 | 3.38699900  | H  | 0.69796500  | 2.20721200  | 2.99452500  |
| H | 0.83205000  | -2.18148700 | 3.54069100  | H  | 1.98410000  | 2.47925400  | 4.19268500  |
| H | 0.48619300  | -0.63258700 | 2.76375300  | C  | -1.95906400 | -4.07964700 | -0.40112600 |
| H | -0.20776200 | -0.99640400 | 4.36398300  | H  | -2.91211300 | -4.22565800 | -0.92033100 |
| C | 4.39351500  | -1.64157600 | 1.10385100  | H  | -1.30028600 | -3.53886400 | -1.09954100 |
| H | 3.58114600  | -1.10896400 | 1.62526800  | H  | -1.50137100 | -5.06547100 | -0.21766500 |
| H | 4.37026600  | -2.68016400 | 1.46785700  | Ag | -1.64465900 | -0.46087100 | -0.78737100 |
| H | 5.34407900  | -1.19844700 | 1.42494300  | H  | -5.95533400 | 1.33182900  | -1.25633100 |
| C | 1.50415200  | -2.34520400 | -2.96128000 | H  | -4.47887900 | 2.17018100  | -3.06214300 |
| H | 0.67177900  | -1.67547300 | -2.68249600 | H  | -1.54266700 | 5.20749700  | 0.15092100  |
| H | 1.55648700  | -2.36984800 | -4.05620800 | H  | 1.15450700  | 5.26520700  | 0.86125500  |

B<sub>2</sub>IDip<sub>2</sub>...2AgCl

|    |             |             |             |   |             |             |             |
|----|-------------|-------------|-------------|---|-------------|-------------|-------------|
| B  | 0.36088100  | 0.74323200  | 0.12191000  | C | 3.76330300  | 1.52811100  | 1.22862200  |
| B  | 0.36092500  | -0.74323200 | -0.12177900 | C | 4.56910000  | 0.09260700  | 3.00954500  |
| N  | -0.09578200 | 3.30235700  | 0.28868500  | H | 5.35276100  | -0.54972700 | 3.41912200  |
| C  | 0.60229100  | 2.16993200  | 0.59166300  | C | 3.39441000  | 0.29130200  | 3.72870200  |
| Cl | -2.59715600 | 0.00665900  | -3.39472500 | H | 3.25686900  | -0.19224100 | 4.69932300  |
| N  | 1.58661200  | 2.57654700  | 1.44702500  | C | 2.37663900  | 1.11726500  | 3.23486600  |
| C  | 0.43814900  | 4.38796100  | 0.95210400  | C | 0.60273200  | -2.16981300 | -0.59163600 |
| H  | 0.01499200  | 5.38167600  | 0.84390500  | C | 2.59753900  | -1.71525500 | -1.98551800 |
| Cl | -2.59819900 | -0.00693800 | 3.39397200  | C | 4.75492400  | -0.70517100 | -1.77131900 |
| C  | -2.51691500 | 3.35569500  | 0.04889500  | H | 5.67967800  | -0.54424400 | -1.20966600 |
| C  | -1.25207400 | 3.34788600  | -0.56188700 | C | 3.76373000  | -1.52741900 | -1.22824500 |
| N  | -0.09512200 | -3.30243100 | -0.28888200 | C | -1.25141800 | -3.34819800 | 0.56167000  |
| C  | 1.49422200  | 3.93437000  | 1.67838300  | C | -1.06076400 | -3.37992100 | 1.95309200  |
| H  | 2.18913200  | 4.44833000  | 2.33535100  | C | -2.20571900 | -3.41429300 | 2.75290000  |
| N  | 1.58722900  | -2.57609200 | -1.44696000 | C | -3.47415800 | -3.40926200 | 2.18131600  |
| C  | -3.62896800 | 3.38262500  | -0.79952100 | C | -3.62831100 | -3.38314800 | 0.79929200  |
| H  | -4.62845700 | 3.36840700  | -0.35806800 | H | -4.62780400 | -3.36898900 | 0.35784300  |
| C  | -3.47481100 | 3.40871800  | -2.18154000 | C | -2.51625700 | -3.35609200 | -0.04911800 |
| H  | -4.35482600 | 3.40228900  | -2.82719900 | C | 1.49514700  | -3.93389900 | -1.67850700 |
| C  | -2.20636400 | 3.41384600  | -2.75311700 | C | 0.43906300  | -4.38782000 | -0.95244800 |
| H  | -2.09616500 | 3.40363000  | -3.83936400 | C | 4.56973700  | -0.09184800 | -3.00899300 |
| C  | -1.06141700 | 3.37957700  | -1.95331000 | H | 5.35344400  | 0.55050800  | -3.41846500 |
| C  | 2.59700100  | 1.71589600  | 1.98572400  | C | 3.39515700  | -0.29056800 | -3.72830900 |
| C  | 4.75444700  | 0.70593100  | 1.77190000  | H | 3.25774700  | 0.19297900  | -4.69895600 |
| H  | 5.67929000  | 0.54503400  | 1.21038500  | C | 2.37730700  | -1.11655400 | -3.23465200 |

|   |             |             |             |    |             |             |             |
|---|-------------|-------------|-------------|----|-------------|-------------|-------------|
| C | 0.30937900  | 3.31573100  | -2.54942800 | H  | -2.24911700 | -2.37813600 | -1.96607300 |
| H | 1.00809900  | 4.02737300  | -2.08327400 | C  | 3.90663300  | -2.17545500 | 0.11094200  |
| H | 0.75090100  | 2.31103200  | -2.41938400 | H  | 3.16720700  | -1.77203100 | 0.82358400  |
| H | 0.28312700  | 3.51915100  | -3.62658600 | H  | 3.73964900  | -3.26276400 | 0.06615900  |
| C | 3.90648400  | 2.17611900  | -0.11054900 | H  | 4.90342200  | -2.00787500 | 0.53639600  |
| H | 3.16729700  | 1.77268200  | -0.82342000 | C  | 1.11128900  | -1.34598200 | -3.99185200 |
| H | 3.73948000  | 3.26342400  | -0.06583800 | H  | 0.86916000  | -2.41517900 | -4.08453800 |
| H | 4.90339200  | 2.00855200  | -0.53573700 | H  | 0.23768600  | -0.88019300 | -3.50083500 |
| C | 1.11054900  | 1.34704200  | 3.99186100  | H  | 1.16642000  | -0.92655100 | -5.00301900 |
| H | 0.23650300  | 0.88356800  | 3.49949200  | C  | -2.65972400 | 3.30805100  | 1.53490300  |
| H | 1.16451600  | 0.92562700  | 5.00226200  | H  | -2.24995500 | 2.37772500  | 1.96589700  |
| H | 0.87007500  | 2.41645900  | 4.08644200  | H  | -2.14254700 | 4.14251400  | 2.03312600  |
| C | 0.31001600  | -3.31601500 | 2.54923300  | H  | -3.71350200 | 3.34514400  | 1.83368200  |
| H | 1.00895100  | -4.02719600 | 2.08270600  | H  | 0.01604300  | -5.38161600 | -0.84447500 |
| H | 0.75124300  | -2.31112000 | 2.41968700  | H  | 2.19025600  | -4.44761000 | -2.33546300 |
| H | 0.28382100  | -3.51996300 | 3.62629300  | H  | -2.09554600 | -3.40411000 | 3.83915000  |
| C | -2.65905100 | -3.30839900 | -1.53511600 | H  | -4.35418200 | -3.40287600 | 2.82697300  |
| H | -2.14196600 | -4.14292600 | -2.03333400 | Ag | -1.20543900 | 0.20464700  | -1.44546300 |
| H | -3.71282800 | -3.34532900 | -1.83392500 | Ag | -1.20525400 | -0.20517200 | 1.44566800  |

B<sub>2</sub>IDip<sub>2</sub>...3AgCl compound

|    |             |             |            |    |             |            |             |
|----|-------------|-------------|------------|----|-------------|------------|-------------|
| B  | -0.05793900 | 0.78482600  | 0.08936500 | N  | -1.07902300 | 3.17488700 | 0.02352800  |
| B  | 0.03907000  | -0.75860600 | 0.05914200 | C  | 0.70046400  | 4.45479600 | 0.22573500  |
| N  | 1.07588500  | 3.13085100  | 0.25733400 | H  | 1.43118200  | 5.25238300 | 0.31511500  |
| C  | -0.02143400 | 2.32287500  | 0.12857400 | Cl | 1.15432500  | 0.27181600 | -4.28468800 |
| Cl | 2.10352300  | -0.18803900 | 4.07396900 | C  | 3.24860300  | 2.30508200 | -0.53550100 |

|   |             |             |             |   |             |             |             |
|---|-------------|-------------|-------------|---|-------------|-------------|-------------|
| C | 2.40902000  | 2.66827200  | 0.52805400  | C | 2.40166600  | -2.55157000 | -0.86674500 |
| N | 1.27725700  | -3.03641500 | -0.11339200 | C | 2.29119800  | -2.56901200 | -2.26948200 |
| C | -0.65070700 | 4.48409400  | 0.07434900  | C | 3.36745800  | -2.06375400 | -3.00232300 |
| H | -1.35041300 | 5.31066600  | 0.00112900  | C | 4.50081800  | -1.57790000 | -2.35453900 |
| N | -0.63121200 | -3.13314200 | 0.91363000  | H | 5.32951700  | -1.17901400 | -2.94489300 |
| C | 4.50623800  | 1.78939300  | -0.19636200 | C | 4.58255700  | -1.58910600 | -0.96689200 |
| H | 5.18079600  | 1.48701300  | -1.00195200 | H | 5.47652600  | -1.20822900 | -0.46487100 |
| C | 4.89790600  | 1.66087800  | 1.13181100  | C | 3.52934500  | -2.07570100 | -0.18165500 |
| H | 5.87853800  | 1.24009900  | 1.36966300  | C | -0.09383200 | -4.40115900 | 0.93655700  |
| C | 4.05600000  | 2.07061300  | 2.16287800  | C | 1.10324100  | -4.34093000 | 0.29172900  |
| H | 4.35785100  | 1.95794600  | 3.20605000  | C | -4.46681700 | -2.00942400 | 2.16912800  |
| C | 2.79211400  | 2.59489000  | 1.88088800  | H | -5.46496400 | -1.68446500 | 2.47266000  |
| C | -2.46331100 | 2.80127300  | -0.07701200 | C | -3.38821800 | -1.81803200 | 3.02512000  |
| C | -4.49263000 | 2.09312500  | 0.96469700  | H | -3.53911600 | -1.35762300 | 4.00569700  |
| H | -5.04291900 | 1.76075300  | 1.84891700  | C | -2.09341300 | -2.20963800 | 2.65940200  |
| C | -3.13283400 | 2.39522500  | 1.09033000  | C | 1.88564700  | 3.07290400  | 2.97161500  |
| C | -5.14030400 | 2.20361300  | -0.26135500 | H | 1.83559400  | 4.17402400  | 2.99810700  |
| H | -6.19839800 | 1.94695600  | -0.33998200 | H | 0.85169500  | 2.71326600  | 2.84421400  |
| C | -4.44243100 | 2.59509400  | -1.39866900 | H | 2.22562600  | 2.71670600  | 3.95027300  |
| H | -4.94476000 | 2.62101000  | -2.36748500 | C | -2.41546900 | 2.25382100  | 2.39444700  |
| C | -3.08033000 | 2.89558100  | -1.33537900 | H | -1.76888100 | 1.35683000  | 2.40432200  |
| C | 0.21252900  | -2.27618800 | 0.26890000  | H | -1.76297500 | 3.11289800  | 2.61213200  |
| C | -1.94412800 | -2.78434700 | 1.38877400  | H | -3.12159700 | 2.15029000  | 3.22736700  |
| C | -4.28807600 | -2.61744000 | 0.92887300  | C | -2.28135100 | 3.21300100  | -2.55839000 |
| H | -5.12991500 | -2.74487600 | 0.24600900  | H | -1.48568400 | 2.46481000  | -2.71878900 |
| C | -3.01831600 | -3.02280200 | 0.51207800  | H | -2.90978500 | 3.20629400  | -3.45572000 |



|   |             |             |             |
|---|-------------|-------------|-------------|
| H | -1.78360800 | 4.19340100  | -2.50301400 |
| C | 1.05391400  | -3.07608000 | -2.94086600 |
| H | 0.87355900  | -4.14223200 | -2.72818800 |
| H | 0.15386600  | -2.52989400 | -2.60861000 |
| H | 1.11144500  | -2.94261200 | -4.02664800 |
| C | 3.63710100  | -2.07124000 | 1.30844600  |
| H | 2.72648100  | -2.40810300 | 1.82161300  |
| H | 4.46012500  | -2.71735700 | 1.65009500  |
| H | 3.85836100  | -1.06272600 | 1.69126600  |
| C | -2.79393500 | -3.65434300 | -0.82400000 |
| H | -2.06005300 | -3.08831300 | -1.42031600 |
| H | -2.41406900 | -4.68489100 | -0.73382400 |
| H | -3.71703100 | -3.67266900 | -1.41257200 |
| C | -0.95683900 | -2.03415100 | 3.61199900  |

|    |             |             |             |
|----|-------------|-------------|-------------|
| H  | 0.01512400  | -2.33981900 | 3.20394900  |
| H  | -0.85080300 | -0.98875300 | 3.93798300  |
| H  | -1.11883500 | -2.62083500 | 4.52906100  |
| C  | 2.87517100  | 2.50592400  | -1.96812600 |
| H  | 3.08339100  | 1.61725200  | -2.58145800 |
| H  | 1.81550400  | 2.75414100  | -2.11638900 |
| H  | 3.46020600  | 3.33022300  | -2.40647400 |
| Cl | -3.98617600 | -0.65658600 | -1.94413900 |
| H  | 3.28887200  | -2.01870900 | -4.08974100 |
| H  | 1.84914600  | -5.10237500 | 0.08719600  |
| H  | -0.61417400 | -5.22765900 | 1.41010100  |
| Ag | -1.98340800 | -0.17338200 | -0.72551500 |
| Ag | 1.04037100  | 0.00091200  | 1.93147200  |
| Ag | 0.65942900  | 0.11250700  | -1.95259900 |

B<sub>2</sub>LDip<sub>2</sub>...AuCl

|    |             |             |             |
|----|-------------|-------------|-------------|
| B  | 0.51872800  | -0.62719200 | 0.00817600  |
| B  | 0.18786300  | 0.82918100  | -0.03354400 |
| N  | 0.21384100  | -3.03721200 | 0.89772700  |
| C  | 0.94868900  | -2.04629000 | 0.29332500  |
| N  | 2.16756100  | -2.62025000 | 0.04024700  |
| C  | 0.96277500  | -4.18884300 | 1.01587700  |
| H  | 0.55617400  | -5.08654800 | 1.47174600  |
| Cl | -3.57985000 | -1.04208700 | -1.79538600 |
| C  | -2.17442500 | -3.36009100 | 0.56097200  |
| C  | -1.13276900 | -2.87369200 | 1.36435900  |

|   |             |             |            |
|---|-------------|-------------|------------|
| N | -0.91794100 | 3.17403200  | 0.10893900 |
| C | 2.18565700  | -3.93180500 | 0.48068300 |
| H | 3.06027700  | -4.56274700 | 0.35499800 |
| N | 1.22997800  | 3.12704700  | 0.46363100 |
| C | -3.48245300 | -3.13223200 | 0.99720400 |
| H | -4.31101300 | -3.44966200 | 0.36146900 |
| C | -3.72722100 | -2.44582300 | 2.18143600 |
| H | -4.75700100 | -2.26055600 | 2.49613900 |
| C | -2.67146800 | -1.97408100 | 2.95730400 |
| H | -2.87091900 | -1.42734900 | 3.88340800 |

|   |             |             |             |   |             |             |             |
|---|-------------|-------------|-------------|---|-------------|-------------|-------------|
| C | -1.34566800 | -2.17515000 | 2.56300400  | C | 4.41146500  | 2.17463500  | 2.08664600  |
| C | 3.23254100  | -2.00318100 | -0.68868300 | H | 4.81817900  | 2.04799800  | 3.09386400  |
| C | 5.45917900  | -1.12044600 | -0.72032800 | C | 3.06547200  | 2.52410200  | 1.93475600  |
| H | 6.36928200  | -0.81947300 | -0.19416000 | C | -0.20161800 | -1.61964800 | 3.34718500  |
| C | 4.38243700  | -1.61862200 | 0.01827900  | H | 0.60637100  | -2.35366000 | 3.49047900  |
| C | 5.37065600  | -0.98242100 | -2.10300700 | H | 0.24692200  | -0.75972900 | 2.81757700  |
| H | 6.22123600  | -0.58977700 | -2.66612100 | H | -0.52522400 | -1.27545600 | 4.33780800  |
| C | 4.20120500  | -1.33237800 | -2.77171600 | C | 4.42140800  | -1.70693700 | 1.51042200  |
| H | 4.13372600  | -1.21432600 | -3.85639400 | H | 3.55520600  | -1.19162900 | 1.95577400  |
| C | 3.10435800  | -1.86026400 | -2.08082200 | H | 4.38842000  | -2.74555900 | 1.87479500  |
| C | 0.15853800  | 2.31636000  | 0.15686300  | H | 5.33104700  | -1.24469000 | 1.91358500  |
| C | 2.57764600  | 2.68370900  | 0.62853900  | C | 1.84899200  | -2.24779400 | -2.79087800 |
| C | 4.70309600  | 2.11393800  | -0.31099500 | H | 1.04465100  | -1.51447800 | -2.60705700 |
| H | 5.34082000  | 1.94129300  | -1.18152500 | H | 2.00456100  | -2.30885400 | -3.87475700 |
| C | 3.36207300  | 2.45469000  | -0.51289200 | H | 1.45927300  | -3.21766200 | -2.44714900 |
| C | -2.28225900 | 2.77279100  | -0.06673400 | C | -2.01407900 | 3.26850300  | -2.51730400 |
| C | -2.84922600 | 2.85884500  | -1.34727100 | H | -1.54737800 | 4.25628800  | -2.38106700 |
| C | -4.18430400 | 2.47417600  | -1.48717500 | H | -1.19189800 | 2.55058900  | -2.67292200 |
| C | -4.91068100 | 2.01222300  | -0.39457900 | H | -2.60528000 | 3.29875400  | -3.44008400 |
| C | -4.31822500 | 1.92362700  | 0.86101300  | C | -2.30316000 | 2.13381100  | 2.37106900  |
| H | -4.88754500 | 1.53694600  | 1.71044300  | H | -1.70958100 | 3.01580700  | 2.65723900  |
| C | -2.98611900 | 2.30070000  | 1.05259800  | H | -3.02336500 | 1.93217000  | 3.17403000  |
| C | 0.81978000  | 4.44023400  | 0.60790300  | H | -1.60133000 | 1.28147900  | 2.32654300  |
| C | -0.51968800 | 4.46718500  | 0.38274500  | C | 2.76806400  | 2.54183700  | -1.87978000 |
| C | 5.22524200  | 1.98604000  | 0.97320900  | H | 2.04724400  | 1.71898800  | -2.03279300 |
| H | 6.27856600  | 1.72540200  | 1.10795800  | H | 2.20648600  | 3.47635900  | -2.03177200 |

|   |             |             |             |    |             |             |             |
|---|-------------|-------------|-------------|----|-------------|-------------|-------------|
| H | 3.53762200  | 2.46941900  | -2.65820900 | H  | -1.25644800 | -3.36775000 | -1.37948900 |
| C | 2.15503600  | 2.69353100  | 3.10904700  | H  | -1.35219000 | -4.97405800 | -0.63217500 |
| H | 1.76643600  | 3.72029200  | 3.19510600  | H  | -5.94432300 | 1.68799400  | -0.53164900 |
| H | 1.27444700  | 2.03699100  | 3.02271400  | H  | -4.64313600 | 2.49643300  | -2.47810600 |
| H | 2.66621700  | 2.45513300  | 4.04985700  | H  | -1.22960600 | 5.28873100  | 0.39100900  |
| C | -1.88608500 | -4.01732900 | -0.74973900 | H  | 1.52301600  | 5.23365300  | 0.84270300  |
| H | -2.80872700 | -4.20211100 | -1.31104600 | Au | -1.51835400 | -0.33453000 | -0.73763800 |

B<sub>2</sub>IDip<sub>2</sub>...2AuCl

|    |             |             |             |   |             |             |             |
|----|-------------|-------------|-------------|---|-------------|-------------|-------------|
| B  | -0.55396300 | 0.33127100  | 0.52726900  | C | -4.46886300 | -3.12729800 | 0.11587200  |
| B  | 0.55372000  | 0.33168100  | -0.52700200 | H | -4.94117800 | -3.94960100 | -0.42512700 |
| N  | -2.58924200 | 0.02966800  | 2.12866700  | C | -4.76272300 | -1.81396300 | -0.23689900 |
| C  | -1.43534100 | 0.63837600  | 1.74035100  | H | -5.45172300 | -1.60976800 | -1.05938100 |
| Cl | -2.29668300 | -2.35573000 | -2.71684900 | C | -4.14320800 | -0.74397700 | 0.41204900  |
| N  | -1.18243200 | 1.57398000  | 2.69925000  | C | -0.14387100 | 2.56003100  | 2.63087700  |
| C  | -3.04239100 | 0.57163500  | 3.31467900  | C | 0.53059000  | 4.73508500  | 1.88895700  |
| H  | -3.94766600 | 0.20929800  | 3.79209600  | H | 0.32449000  | 5.66361000  | 1.34893800  |
| Cl | 2.29723700  | -2.35660700 | 2.71558400  | C | -0.43798100 | 3.73130800  | 1.90894600  |
| C  | -2.91373000 | -2.36545500 | 1.81760800  | C | 1.74898000  | 4.55835800  | 2.54430300  |
| C  | -3.23290900 | -1.05361200 | 1.43502100  | H | 2.49933200  | 5.35247300  | 2.51844400  |
| N  | 2.58934000  | 0.03145500  | -2.12826800 | C | 2.01454500  | 3.38151400  | 3.23368500  |
| C  | -2.16012900 | 1.54247100  | 3.67250800  | H | 2.97098800  | 3.25197600  | 3.74731800  |
| H  | -2.13630700 | 2.21493300  | 4.52431500  | C | 1.06647100  | 2.34848000  | 3.30486500  |
| N  | 1.18208000  | 1.57554400  | -2.69837000 | C | 1.43516900  | 0.63960700  | -1.73984800 |
| C  | -3.55634800 | -3.40008700 | 1.12934700  | C | 0.14326800  | 2.56133400  | -2.62970800 |
| H  | -3.31841400 | -4.43415800 | 1.39001200  | C | -0.53169100 | 4.73599100  | -1.88703900 |

|   |             |             |             |   |             |             |             |
|---|-------------|-------------|-------------|---|-------------|-------------|-------------|
| H | -0.32582900 | 5.66436000  | -1.34665600 | H | 2.09188500  | 0.46288700  | 3.54214100  |
| C | 0.43709100  | 3.73240700  | -1.90732700 | H | 1.78831800  | 1.32647400  | 5.05295200  |
| C | 3.23320200  | -1.05211900 | -1.43526200 | C | 4.36767800  | 0.67099800  | 0.01879500  |
| C | 4.14349400  | -0.74291500 | -0.41214100 | H | 4.56091500  | 1.35064900  | -0.82513500 |
| C | 4.76344400  | -1.81314400 | 0.23596500  | H | 3.47616700  | 1.05960000  | 0.54323000  |
| C | 4.47000900  | -3.12633100 | -0.11775800 | H | 5.21159900  | 0.74650500  | 0.71503400  |
| C | 3.55748500  | -3.39869500 | -1.13133400 | C | 1.90567000  | -2.63298800 | -2.88702800 |
| H | 3.31993200  | -4.43265700 | -1.39278100 | H | 2.13373300  | -2.10260000 | -3.82441500 |
| C | 2.91444900  | -2.36377700 | -1.81879400 | H | 1.84286800  | -3.70290100 | -3.11615900 |
| C | 2.15994600  | 1.54481200  | -3.67149400 | H | 0.89380900  | -2.31122600 | -2.58343700 |
| C | 3.04249400  | 0.57413400  | -3.31394800 | C | 1.73573500  | 3.86719800  | -1.18010600 |
| C | -1.74998600 | 4.55927600  | -2.54255000 | H | 1.78954100  | 3.15313800  | -0.33993700 |
| H | -2.50046700 | 5.35326100  | -2.51650800 | H | 2.60198000  | 3.65839800  | -1.82691200 |
| C | -2.01525200 | 3.38264500  | -3.23240000 | H | 1.86243100  | 4.87451700  | -0.76553600 |
| H | -2.97160500 | 3.25312500  | -3.74620600 | C | -1.35984600 | 1.09938500  | -4.06672000 |
| C | -1.06699200 | 2.34980100  | -3.30387200 | H | -0.47506400 | 0.46827000  | -4.21864800 |
| C | -4.36786300 | 0.67013800  | -0.01797600 | H | -2.09198400 | 0.46411000  | -3.54198300 |
| H | -4.56021400 | 1.34935600  | 0.82649300  | H | -1.78859000 | 1.32838600  | -5.05241700 |
| H | -3.47692200 | 1.05900300  | -0.54320900 | C | -1.90500400 | -2.63510800 | 2.88579200  |
| H | -5.21252900 | 0.74597100  | -0.71328000 | H | -0.89327800 | -2.31246500 | 2.58274000  |
| C | -1.73664600 | 3.86602900  | 1.18175000  | H | -2.13362400 | -2.10581500 | 3.82366200  |
| H | -1.79042700 | 3.15198100  | 0.34155500  | H | -1.84162400 | -3.70521700 | 3.11388000  |
| H | -2.60284400 | 3.65713300  | 1.82858400  | H | 3.94799800  | 0.21236600  | -3.79136000 |
| H | -1.86342700 | 4.87335500  | 0.76724300  | H | 2.13605100  | 2.21769700  | -4.52296400 |
| C | 1.35961600  | 1.09778400  | 4.06715800  | H | 5.45247300  | -1.60931900 | 1.05851700  |
| H | 0.47496800  | 0.46642700  | 4.21884700  | H | 4.94268100  | -3.94886300 | 0.42257700  |

|                                           |             |             |             |    |             |             |             |
|-------------------------------------------|-------------|-------------|-------------|----|-------------|-------------|-------------|
| Au                                        | -1.13078500 | -0.96144800 | -1.14139200 | Au | 1.13083200  | -0.96184600 | 1.14097100  |
| B <sub>2</sub> LDip <sub>2</sub> ...3AuCl |             |             |             |    |             |             |             |
| B                                         | -0.09937100 | 0.73079200  | 0.31045700  | C  | -4.51745300 | 2.71237400  | 1.17717800  |
| B                                         | 0.01198500  | -0.77291800 | -0.27549800 | H  | -5.20819600 | 2.41120300  | 1.96815000  |
| N                                         | 1.18572700  | 2.85566100  | 1.16417700  | C  | -3.14555000 | 2.70155900  | 1.43349300  |
| C                                         | 0.05237400  | 2.22801500  | 0.72975100  | C  | -5.00343100 | 3.08067800  | -0.07336300 |
| Cl                                        | 1.54767100  | -1.46105300 | 3.90181500  | H  | -6.07917100 | 3.07002000  | -0.25864400 |
| N                                         | -0.89217300 | 3.20404200  | 0.67446300  | C  | -4.13261000 | 3.42750000  | -1.09987500 |
| C                                         | 0.94712900  | 4.19685600  | 1.36091700  | H  | -4.52370700 | 3.68152700  | -2.08784600 |
| H                                         | 1.73129900  | 4.86362400  | 1.70558200  | C  | -2.74902700 | 3.42782400  | -0.90108000 |
| Cl                                        | 1.43661200  | 1.69942600  | -3.79840500 | C  | 0.29450600  | -2.26374700 | -0.65928800 |
| C                                         | 3.45707700  | 2.19245100  | 0.51432500  | C  | -1.81640000 | -3.37285000 | 0.12435600  |
| C                                         | 2.44663700  | 2.24319600  | 1.48504900  | C  | -4.19060200 | -3.30808700 | -0.14180000 |
| N                                         | 1.43553500  | -2.75964400 | -1.21886500 | H  | -5.07045200 | -3.16900100 | -0.77203900 |
| C                                         | -0.35702700 | 4.41767200  | 1.05264600  | C  | -2.92542500 | -3.24213700 | -0.72725700 |
| H                                         | -0.96322200 | 5.31782400  | 1.06730100  | C  | 2.61106000  | -2.01784500 | -1.58810900 |
| N                                         | -0.50932400 | -3.34838300 | -0.47723300 | C  | 2.70047600  | -1.56009800 | -2.91519400 |
| C                                         | 4.66408600  | 1.59041600  | 0.89617700  | C  | 3.84360400  | -0.83988700 | -3.26898200 |
| H                                         | 5.47548400  | 1.54103000  | 0.16519300  | C  | 4.86266200  | -0.62664900 | -2.34428000 |
| C                                         | 4.84002800  | 1.07112100  | 2.17351400  | H  | 5.75081800  | -0.06120000 | -2.63808400 |
| H                                         | 5.78493500  | 0.58938800  | 2.43875000  | C  | 4.76010300  | -1.12988100 | -1.05242700 |
| C                                         | 3.82881800  | 1.17717500  | 3.12596900  | H  | 5.57260200  | -0.98078400 | -0.33645600 |
| H                                         | 3.96626600  | 0.77079800  | 4.13021200  | C  | 3.62456100  | -1.83648500 | -0.63510600 |
| C                                         | 2.61583700  | 1.79072000  | 2.80766900  | C  | 0.11767500  | -4.49277600 | -0.91759400 |
| C                                         | -2.29546500 | 3.07182100  | 0.37776000  | C  | 1.33884300  | -4.12334300 | -1.38395500 |



|   |             |             |             |    |             |             |             |
|---|-------------|-------------|-------------|----|-------------|-------------|-------------|
| C | -4.32987200 | -3.49903800 | 1.22979400  | H  | 2.63740000  | -2.94266700 | 0.96809500  |
| H | -5.32820700 | -3.53126400 | 1.67199100  | H  | 4.40727500  | -3.01300800 | 0.98341600  |
| C | -3.21072800 | -3.64304400 | 2.04129800  | H  | 3.57526900  | -1.54960700 | 1.50249800  |
| H | -3.32768800 | -3.80173700 | 3.11653300  | C  | -2.74636900 | -3.02301100 | -2.19529400 |
| C | -1.91740900 | -3.59760900 | 1.50554400  | H  | -2.08071400 | -2.16911500 | -2.40222400 |
| C | 1.55145100  | 1.99321700  | 3.83904900  | H  | -2.30223600 | -3.90150900 | -2.69166800 |
| H | 1.47028500  | 3.05557900  | 4.12350000  | H  | -3.70331200 | -2.80109700 | -2.68038100 |
| H | 0.55657200  | 1.68128900  | 3.48517000  | C  | -0.73044900 | -3.82416900 | 2.38555700  |
| H | 1.76206300  | 1.40892100  | 4.74134700  | H  | 0.23222000  | -3.67075600 | 1.88073100  |
| C | -2.58468400 | 2.27293700  | 2.75117200  | H  | -0.73140800 | -3.15360500 | 3.25606900  |
| H | -2.01816000 | 1.32948100  | 2.65399000  | H  | -0.72900300 | -4.85168300 | 2.78174100  |
| H | -1.88948100 | 3.01519600  | 3.17438600  | C  | 3.30981600  | 2.77073400  | -0.85490000 |
| H | -3.37837500 | 2.10048900  | 3.48723800  | H  | 3.38269000  | 1.99833200  | -1.63580600 |
| C | -1.79343700 | 3.72374100  | -2.01024200 | H  | 2.35123000  | 3.28046300  | -1.01709100 |
| H | -1.31499800 | 2.79892600  | -2.37738800 | H  | 4.11106900  | 3.49711700  | -1.05748900 |
| H | -2.30261000 | 4.18058700  | -2.86666000 | Cl | -4.34068700 | -0.09892000 | -1.03654300 |
| H | -0.97307400 | 4.39260000  | -1.70991200 | Au | 0.70665900  | -0.65608200 | 1.80930500  |
| C | 1.61894900  | -1.83704700 | -3.91037200 | Au | 0.73918600  | 0.71112900  | -1.73259500 |
| H | 1.69707700  | -2.86019000 | -4.31385200 | Au | -2.04186800 | -0.02742000 | -0.34457000 |
| H | 0.61221300  | -1.74347400 | -3.47458000 | H  | 3.91257700  | -0.42414400 | -4.27607600 |
| H | 1.67328600  | -1.13430900 | -4.74933300 | H  | 2.15251300  | -4.69785300 | -1.81514100 |
| C | 3.54702200  | -2.36411100 | 0.76127100  | H  | -0.36854900 | -5.46086400 | -0.84985800 |

Table S4 EDA results of B<sub>2</sub>IDip<sub>2</sub>···nMCl(n=1, 2, 3; M=Cu, Ag, and Au) interactions(in kcal/mol)

|                                           | CuCl   | AgCl   | AuCl   | 2CuCl   | 2AgCl  | 2AuCl  | 3CuCl  | 3AgCl  | 3AuCl  |
|-------------------------------------------|--------|--------|--------|---------|--------|--------|--------|--------|--------|
| $\Delta E$                                | -96.9  | -81.0  | -110.3 | -182.47 | -158.8 | -200.2 | -254.0 | -229.4 | -300.7 |
| $\Delta E_{\text{Pauli}}$                 | 134.7  | 145.9  | 232.9  | 321.8   | 302.8  | 471.8  | 581.0  | 481.3  | 799.6  |
| $\Delta E_{\text{elstat}}$                | -153.4 | -161.0 | -241.2 | -316.8  | -311.2 | -452.6 | -514.0 | -497.9 | -751.9 |
| $\Delta E_{\text{orb}}$                   | -78.3  | -66.0  | -102.0 | -187.4  | -145.3 | -219.4 | -321.1 | -212.8 | -348.4 |
| <sup>a</sup> $\Delta E_{\text{elstat}}\%$ | 66.2   | 70.9   | 70.3   | 62.8    | 68.2   | 67.4   | 61.6   | 70.1   | 68.3   |
| <sup>a</sup> $\Delta E_{\text{orb}}\%$    | 33.8   | 29.1   | 29.7   | 37.2    | 31.8   | 32.6   | 38.4   | 29.9   | 31.7   |

<sup>a</sup> $\Delta E_{\text{elstat}}\% = \Delta E_{\text{elstat}} / (\Delta E_{\text{elstat}} + \Delta E_{\text{orb}})$ ;  $\Delta E_{\text{orb}}\% = \Delta E_{\text{orb}} / (\Delta E_{\text{elstat}} + \Delta E_{\text{orb}})$

Table S5 Natural population analysis charges and Wiberg bond indexes of the studied complexes

| $\square$               | B <sub>2</sub> IDip <sub>2</sub> | CuCl      | AgCl      | AuCl      | 2CuCl     | 2AgCl     | 2AuCl     | 3CuCl | 3AgCl | 3AuCl |
|-------------------------|----------------------------------|-----------|-----------|-----------|-----------|-----------|-----------|-------|-------|-------|
| WBI <sub>B-B</sub>      | 1.97                             | 1.96      | 1.99      | 1.85      | 1.80      | 1.92      | 1.70      | 1.74  | 1.93  | 1.52  |
| WBI <sub>B1-M1</sub>    |                                  | 0.36      | 0.31      | 0.46      | 0.36      | 0.28      | 0.47      | 0.28  | 0.24  | 0.36  |
| WBI <sub>B2-M1</sub>    |                                  | 0.38      | 0.31      | 0.47      | 0.34      | 0.27      | 0.39      | 0.29  | 0.24  | 0.34  |
| WBI <sub>B1-M2</sub>    |                                  |           |           |           | 0.34      | 0.27      | 0.39      | 0.34  | 0.20  | 0.34  |
| WBI <sub>B2-M2</sub>    |                                  |           |           |           | 0.36      | 0.28      | 0.47      | 0.35  | 0.19  | 0.37  |
| WBI <sub>B1-M3</sub>    |                                  |           |           |           |           |           |           | 0.29  | 0.23  | 0.41  |
| WBI <sub>B2-M3</sub>    |                                  | $\square$ | $\square$ | $\square$ | $\square$ | $\square$ | $\square$ | 0.28  | 0.24  | 0.41  |
| q(B1+B2)                | -0.25                            | -0.54     | -0.48     | -0.40     | -0.68     | -0.61     | -0.52     | -0.89 | -0.83 | -0.65 |
| $\Delta q_{(B1+B2)}$    |                                  | -0.29     | -0.23     | -0.15     | -0.42     | -0.36     | -0.27     | -0.64 | -0.58 | -0.40 |
| $\Delta q_{MCl1}$       |                                  | -0.08     | -0.20     | -0.29     | -0.07     | -0.15     | -0.23     | 0.001 | -0.11 | -0.17 |
| $\Delta q_{MCl2}$       |                                  |           |           |           | -0.07     | -0.15     | -0.23     | -0.08 | -0.10 | -0.17 |
| $\Delta q_{MCl3}$       |                                  |           |           |           |           |           |           | 0.02  | -0.11 | -0.16 |
| Sum $\Delta q_{(M+Cl)}$ |                                  | -0.08     | -0.20     | -0.29     | -0.13     | -0.31     | -0.46     | -0.07 | -0.32 | -0.50 |
| Average                 |                                  | -0.08     | -0.20     | -0.29     | -0.07     | -0.15     | -0.23     | -0.02 | -0.11 | -0.17 |

Table S6 A selection of NBO results for the studied complexes

| Complexes                                 | Donor NBO | $\delta_{\text{donor}}$ | <sup>a</sup> Acceptor NBO | $\delta_{\text{acc}}$ | $\Delta^2E$ (kcal/mol ) | <sup>b</sup> Donor NBO | $\delta_{\text{donor}}$ | <sup>b</sup> Acceptor NBO | $\delta_{\text{acc}}$ | $\Delta^2E$ (kcal/mol ) |
|-------------------------------------------|-----------|-------------------------|---------------------------|-----------------------|-------------------------|------------------------|-------------------------|---------------------------|-----------------------|-------------------------|
| B <sub>2</sub> IDip <sub>2</sub> ...CuCl  | BD(B1-B2) | 1.6231                  | LP*Cu1                    | 0.4233                | 109.43                  | LPCu1                  | 1.8665                  | BD* (B1-B2)               | 0.0778                | 6.72                    |
| B <sub>2</sub> IDip <sub>2</sub> ...2CuCl | BD(B1-B2) | 1.5576                  | LP*Cu1                    | 0.4165                | 47.56                   | LPCu1                  | 1.8626                  | BD* (B1-B2)               | 0.1403                | 4.93                    |
|                                           | BD(B1-B2) | 1.5576                  | LP*Cu2                    | 0.4164                | 48.42                   | LPCu2                  | 1.8625                  | BD* (B1-B2)               | 0.1403                | 5.05                    |
| B <sub>2</sub> IDip <sub>2</sub> ...3CuCl | BD(B1-B2) | 1.6168                  | LP*Cu1                    | 0.3761                | 32.77                   | LPCu1                  | 1.8666                  | BD* (B1-B2)               | 0.2443                | 9.03                    |
|                                           | BD(B1-B2) | 1.5324                  | LP*Cu2                    | 0.1894                | 49.45                   | LPCu2                  | 1.8547                  | BD* (B1-B2)               | 0.2019                | 12.49                   |
| B <sub>2</sub> IDip <sub>2</sub> ...2AgCl | BD(B1-B2) | 1.6168                  | LP*Cu3                    | 0.3589                | 58.71                   | LPCu3                  | 1.8664                  | BD* (B1-B2)               | 0.2443                | 12.85                   |
|                                           | BD(B1-B2) | 1.6242                  | LP*Ag1                    | 0.4738                | 136.41                  | LPAg1                  | 1.9169                  | BD* (B1-B2)               | 0.0700                | 6.99                    |
| B <sub>2</sub> IDip <sub>2</sub> ...3AgCl | BD(B1-B2) | 1.5373                  | LP*Ag1                    | 0.4299                | 63.8                    | LPAg1                  | 1.9137                  | BD* (B1-B2)               | 0.1263                | 6.26                    |
|                                           | BD(B1-B2) | 1.5373                  | LP*Ag2                    | 0.4298                | 63.83                   | LPAg2                  | 1.9138                  | BD* (B1-B2)               | 0.1263                | 6.25                    |
|                                           | BD(B1-B2) | 1.6249                  | LP*Ag1                    | 0.3531                | 67.43                   | LPAg1                  | 1.9245                  | BD* (B1-B2)               | 0.2059                | 6.13                    |
| B <sub>2</sub> IDip <sub>2</sub> ...2AuCl | BD(B1-B2) | 1.6249                  | LP*Ag2                    | 0.3806                | 78.14                   | LPAg2                  | 1.9119                  | BD* (B1-B2)               | 0.2059                | 9.06                    |
|                                           | BD(B1-B2) | 1.7387                  | LP*Ag3                    | 0.3764                | 63.64                   | LPAg3                  | 1.9101                  | BD* (B1-B2)               | 0.1080                | 7.77                    |
| B <sub>2</sub> IDip <sub>2</sub> ...3AuCl | BD(B1-B2) | 1.5330                  | LP*Au1                    | 0.6930                | 301.26                  | LPAu1                  | 1.8658                  | BD* (B1-B2)               | 0.0790                | 8.77                    |
|                                           | BD(B1-B2) | 1.5035                  | LP*Au1                    | 0.6480                | 215.18                  | LPAu1                  | 1.8584                  | BD* (B1-B2)               | 0.1726                | 10.27                   |
|                                           | BD(B1-B2) | 1.5035                  | LP*Au2                    | 0.6480                | 215.16                  | LPAu2                  | 1.8585                  | BD* (B1-B2)               | 0.1726                | 10.26                   |
| B <sub>2</sub> IDip <sub>2</sub> ...2AuCl | BD(B1-B2) | 1.5281                  | LP*Au1                    | 0.6024                | 375.59                  | LPAu1                  | 1.8696                  | BD* (B1-B2)               | 0.2648                | 14.54                   |
|                                           | BD(B1-B2) | 1.5281                  | LP*Au2                    | 0.5991                | 347.58                  | LPAu2                  | 1.8648                  | BD* (B1-B2)               | 0.2648                | 14.73                   |
| B <sub>2</sub> IDip <sub>2</sub> ...3AuCl | BD(B1-B2) | 1.5773                  | LP*Au3                    | 0.6145                | 340.07                  | LPAu3                  | 1.8390                  | BD* (B1-B2)               | 0.2033                | 21.93                   |

Table S7 Topological parameters at the BCP of the  $\pi(\text{B}\equiv\text{B})\cdots\text{M}$  interaction and  $\text{B}\equiv\text{B}$ ,  $\text{B}-\text{C}$  bonds

|     | BCP            | CuCl   | AgCl   | AuCl   | 2CuCl  | 2AgCl  | 2AuCl  | 3CuCl  | 3AgCl  | 3AuCl  |
|-----|----------------|--------|--------|--------|--------|--------|--------|--------|--------|--------|
| M-B | $\rho$         | 0.087  | 0.079  | 0.098  | 0.084  | 0.076  | 0.096  | 0.082  | 0.077  | 0.096  |
|     | $\nabla^2\rho$ | 0.189  | 0.121  | 0.087  | 0.179  | 0.116  | 0.069  | 0.179  | 0.116  | 0.043  |
|     | $H_c$          | -0.023 | -0.025 | -0.038 | -0.023 | -0.024 | -0.038 | -0.022 | -0.024 | -0.040 |
|     | $-G_c/V_c$     | 0.751  | 0.688  | 0.611  | 0.749  | 0.690  | 0.596  | 0.755  | 0.690  | 0.560  |
|     | $DI$           | 0.594  | 0.559  | 0.615  | 0.521  | 0.473  | 0.621  | 0.452  | 0.454  | 0.605  |
| B-B | $\rho$         | 0.172  | 0.174  | 0.172  | 0.166  | 0.168  | 0.161  | 0.150  | 0.145  | 0.129  |
|     | $\nabla^2\rho$ | -0.299 | -0.320 | -0.340 | -0.279 | -0.301 | -0.263 | -0.189 | -0.161 | -0.087 |
|     | $H_c$          | -0.169 | -0.172 | -0.151 | -0.133 | -0.134 | -0.124 | -0.109 | -0.104 | -0.081 |
|     | $-G_c/V_c$     | 0.358  | 0.349  | 0.304  | 0.322  | 0.305  | 0.319  | 0.362  | 0.380  | 0.422  |
|     | $DI$           | 1.357  | 1.324  | 1.268  | 1.278  | 1.249  | 1.046  | 1.136  | 1.085  | 0.725  |
| B-C | $\rho$         | 0.181  | 0.181  | 0.180  | 0.177  | 0.177  | 0.175  | 0.172  | 0.174  | 0.167  |
|     | $\nabla^2\rho$ | 0.244  | 0.220  | 0.211  | 0.218  | 0.187  | 0.179  | 0.182  | 0.145  | 0.121  |
|     | $H_c$          | -0.175 | -0.172 | -0.176 | -0.171 | -0.173 | -0.170 | -0.166 | -0.170 | -0.163 |
|     | $-G_c/V_c$     | 0.574  | 0.349  | 0.565  | 0.569  | 0.559  | 0.558  | 0.560  | 0.548  | 0.543  |
|     | $DI$           | 0.764  | 0.748  | 0.711  | 0.709  | 0.678  | 0.643  | 0.699  | 0.665  | 0.600  |
